# 1 **Role of Nrp1 in controlling cortical interhemispheric circuits**

2 Martín-Fernández, F<sup>1</sup>., Briz, C. G.<sup>1</sup>, Nieto, M.<sup>1</sup>

3 <sup>1</sup> Department of Cellular and Molecular Biology, Centro Nacional de Biotecnología,  
4 Consejo Superior de Investigaciones Científicas (CNB-CSIC), Campus de Cantoblanco,  
5 Darwin 3, 28049 Madrid, Spain.

6 \*Correspondence to: [mnlopez@cnb.csic.es](mailto:mnlopez@cnb.csic.es)

## 7 **Abstract**

8 Callosal projections establish topographically organized maps between cortical areas.  
9 Neuropilin-1 (Nrp1) cortical gradient induces an early segregation of developing callosal  
10 axons. We investigated later roles of Nrp1 on the development of callosal projections  
11 from layer (L) 2/3 of the primary (S1) and secondary (S2) somatosensory (SS) areas,  
12 which express higher and lower levels of Nrp1, respectively. We used *in utero*  
13 electroporation to knock down or overexpress Nrp1 combined with retrograde tracers, to  
14 map connections at postnatal day 16 and 30. High levels of Nrp1 blocked contralateral  
15 S2 innervation while promoted the late postnatal growth of homotopic S1L2/3 and  
16 heterotopic S2L2/3 branches into S1. Conversely, knocking down Nrp1 increased the  
17 growth of heterotopic S1L2/3 projections into S2, and the overall refinement of S2L2/3  
18 branches, thereby diminishing the number of P30 S2L2/3 callosally projecting neurons.  
19 Thus, the Nrp1 gradient determines homotopic S2L2/3 callosal connectivity by regulating  
20 late postnatal branching and refinement in a topographic manner.

## 21 **Introduction**

22 The cerebral cortex is responsible for the execution of higher cognitive functions (Hill  
23 and Walsh, 2005). During evolution, the cortex had increased in size and complexity  
24 permitting eutherian brains to acquire the corpus callosum (CC). The CC is a  
25 tridimensional structure of myelinated interhemispheric axons that mediates the higher  
26 processing of information by establishing a topographically and hierarchically organized  
27 communication. It interconnects neurons located in equivalent areas of the hemispheres  
28 (homotopic callosal connections), as well as neurons of different modalities and orders  
29 (heterotopic connections) (Wise and Jones, 1976; Miller and Vogt, 1984; Rakic, 1988;  
30 Fenlon *et al.*, 2017; De León Reyes *et al.*, 2020).

31 For the correct processing of information, developmental mechanisms must ensure the  
32 precise definition of two aspects of the organization of adult CC circuits: firstly, the  
33 number of callosally projecting neurons (CPNs) in each cortical area and layer, and  
34 secondly, the topographical arrangement of their contralateral axons. Both of these  
35 aspects are the result of developmental selection processes including refinement (Aboitiz  
36 and Montiel, 2003; Fame *et al.*, 2011; Fenlon and Richards, 2015). Not all cortical areas  
37 contain the same number of CPNs. Their precise proportion defines the different  
38 functional cortical areas and regions. Associative areas, for instance, contain more CPNs  
39 than primary regions. The layer (L) distribution of CPNs also varies within areas,  
40 although in general, CPNs are more abundant in L2/3 and L5 of the adult cortex, there  
41 are some in L6 and very few in L4. The selection of the axonal targets of these CPNs is  
42 also highly specific. Callosal axons branch and synapse in topographically reproducible  
43 locations in the contralateral hemisphere. As a rule, they branch more profusely in  
44 homotopic areas and less in heterotopic locations. These branches form axonal columns  
45 that are usually in proximity to the border between areas (Mitchell and Macklis, 2005;  
46 Courchet *et al.*, 2013; Suarez *et al.*, 2014; Rodriguez-Tornos *et al.*, 2016; Fenlon *et al.*,  
47 2017).

48 As mentioned, axonal refinement plays an important role in CC development. On the one  
49 hand, postnatal refinement dictates the elimination of exuberant branches that had  
50 invaded the cortical plate but do not establish synapses efficiently. This is thought to  
51 select optimal functional connectivity (Stanfield *et al.*, 1982; Innocenti and Clarke, 1984;  
52 Dehay *et al.*, 1986; Meissirel *et al.*, 1991; Innocenti, 2020). On the other hand,  
53 developmental refinement determines the number of CPNs in each area and layer. Early

54 in development, CPNs are remarkably exuberant. Many cortical neurons, and virtually all  
55 neurons located in the upper layers (L2/3 and L4), develop transient callosal axons that  
56 invade the contralateral territories and bear the potential to establish a mature callosal  
57 connection. Most of these developmental projections do not progress into mature  
58 interhemispheric connections and are instead eliminated during the first postnatal weeks  
59 of the animal's life (De Leon Reyes *et al.*, 2019). This CPN refinement is mediated by  
60 mechanisms that partly depend on activity, but which are largely unknown (Innocenti and  
61 Clarke, 1984; Koralek and Killackey, 1990; Innocenti and Price, 2005; Mizuno *et al.*,  
62 2007; Huang *et al.*, 2013; Suárez *et al.*, 2014; Antón-Bolaños *et al.*, 2019; De Leon Reyes  
63 *et al.*, 2019).

64 In the mouse developing cortex, Neuropilin-1 (Nrp1) is expressed in a high to low  
65 mediolateral gradient (Zhao *et al.*, 2011; Zhou *et al.*, 2013; Mucbe *et al.*, 2015). Nrp1 null  
66 mutant mice are embryonically lethal (Kitsukawa *et al.*, 1997). To circumvent lethality,  
67 previous studies relied on Nrp1 conditional lines and on mutants of the binding domain  
68 of the Semaphorins, which are among its known ligands (Nrp1<sup>Sema-</sup> mutant). Nrp1 plays  
69 several roles during CC development (Hatanaka *et al.*, 2009; Zhao *et al.*, 2011; Zhou *et al.*,  
70 2013). At the CC midline, the interaction of Nrp1 with Semaphorin 3 (Sema3) C  
71 mediates the crossing of callosal axons (Gu *et al.*, 2003; Niquille *et al.*, 2009; Piper *et al.*,  
72 2009; Mire *et al.*, 2018). Sema3A, another ligand of Nrp1, is expressed in the developing  
73 neocortex in a gradient that is opposite and complementary to that of Nrp1 (Tamamaki *et al.*,  
74 2003; Zhao *et al.*, 2011). The binding of Sema3A to Nrp1-PlexinA1 induces axonal  
75 repulsion via the collapse of axonal growth cones (Takahashi *et al.*, 1999; Fournier *et al.*,  
76 2000; Wu *et al.*, 2014). Since due to the gradients, callosal axons from motor areas  
77 express high Nrp1 and low Sema3A levels, axonal repulsion leads to the segregation of  
78 motor and somatosensory (SS) callosal axons, which express the opposite combination  
79 (Zhou *et al.*, 2013). This determines that motor and SS axons occupy the dorsal and  
80 ventral callosal routes, respectively, and contributes to their guiding to motor and SS  
81 contralateral areas. Accordingly, genetic ablations of Sema3A or Nrp1 disrupt this axonal  
82 order and disorganizes axonal projections in the contralateral hemisphere (Zhou *et al.*,  
83 2013). This effect is mediated by the steep gradient of Nrp1 expression established  
84 between motor and SS areas. However, little is known about the consequences of the  
85 lower differences that Nrp1 expression gradient creates within each area. Also, it is not  
86 known if Nrp1 plays additional functions on callosal development other than guidance.

87 Herein we investigated the roles of Nrpl gradient during the organization of  
88 somatosensory interhemispheric maps.



## 89 **Results**

### 90 **Nrp1 expression levels determine the pattern of SS contralateral innervation**

91 To investigate the roles of Nrp1 in the development of the callosal circuits of the SS  
92 cortex, we performed *in utero* electroporation (IUE) of constructs knocking down  
93 (shNrp1) or overexpressing Nrp1 (CAG-Nrp1). IUE was performed at embryonic day (E)  
94 15.5 to specifically target L2/3 neurons. Vectors were co-electroporated with a plasmid  
95 encoding GFP (CAG-GFP), thus allowing to characterize the electroporated neurons and  
96 their projections at selected stages after birth (Figure 1A). Electroporations were targeted  
97 to the SS cortex, which is functionally divided into the primary somatosensory cortex  
98 (S1) and the secondary somatosensory cortex (S2), which receives first and higher-order  
99 sensory inputs from the thalamus, respectively (Rakic, 1988; Watson, 2012). For the  
100 analyses, the S1 barrel field area and the more lateral S2 area (Figure 1B) were  
101 distinguished by anatomical hallmarks such as the high density of L4 DAPI<sup>+</sup> nuclei in the  
102 barrels (Paxinos and Franklin, 2004). We first examined the effects of our Nrp1  
103 manipulations on the mature circuit of postnatal day (P) 30 animals. Coronal sections of  
104 brains electroporated with the control plasmid (CAG-GFP) showed that callosal  
105 projections from GFP<sup>+</sup> L2/3 neurons reproducibly elaborate separated axonal columns in  
106 the SS areas of the contralateral hemisphere as described (Courchet *et al.*, 2013; Suárez  
107 *et al.*, 2014). The main column is located at the border of the S1 and S2 area, hereafter  
108 referred to as S1/S2 column (Figure 1A-C, blue arrowheads). Another less dense but very  
109 similar column forms in the lateral border of S2, hereafter referred to as the S2 column  
110 (Figure 1A-C, magenta arrowheads). Within the S1/S2 column, axons branch more  
111 profusely in L2/3 and L5, and within the S2 column, in L2/3 (Figure 1C). When knocking  
112 down Nrp1, we did not advert any obvious change in the overall pattern of contralateral  
113 innervation (Figure 1D). By contrast, overexpressing Nrp1 in L2/3 neurons caused a  
114 visible reduction of S2 axons together with an increase of S1 innervation (Figure 1E). To  
115 quantify these phenotypes, we measured the pixels occupied by the GFP fluorescence  
116 signal in specific regions of interest (ROI) delineating the main relevant SS areas and  
117 columns. To account for any differences in electroporation efficiency, the values of GFP  
118 within these ROIs were normalized to the fluorescence signal of the ipsilateral  
119 hemisphere (see Methods) (Rodríguez-Tornos *et al.*, 2016; Briz *et al.*, 2017). Firstly, the  
120 analysis of the total contralateral innervation showed that the average values and  
121 dispersion are indistinguishable in controls, shNrp1, and CAG-Nrp1 conditions (Figure

122 1F). This result confirmed that changing Nrp1 levels does not cause overall impairments  
123 of axonal innervation. Secondly, we quantified the number of GFP<sup>+</sup> branches forming the  
124 S1/S2 column (Figure 1G), the S2 column (Figure 1H), and the axons in the remaining  
125 S1 area (Figure 1I). This quantification revealed a reduced S2 column and a slight  
126 increase of GFP<sup>+</sup> axons in S1 in CAG-Nrp1 electroporated brains. No differences were  
127 detected in brains electroporated with shNrp1 (Figure 1G-I). An alternative analysis of  
128 the relative distribution of GFP<sup>+</sup> axons in the different contralateral areas rendered  
129 equivalent results (See Methods and Figure 1 – figure supplement 1). The differences in  
130 axonal distribution were not due to neuronal death because the proportions of ipsilateral  
131 GFP<sup>+</sup> neurons were indistinguishable in brains of all conditions (Figure 1 – figure  
132 supplement 2). Thus, increasing Nrp1 levels in L2/3 neurons blocks the development of  
133 their callosal axons in the contralateral S2 area while promoting branching in S1  
134 territories. This suggests the implication of Nrp1 in the area-specific distribution of  
135 callosal branches.

## Figure 1

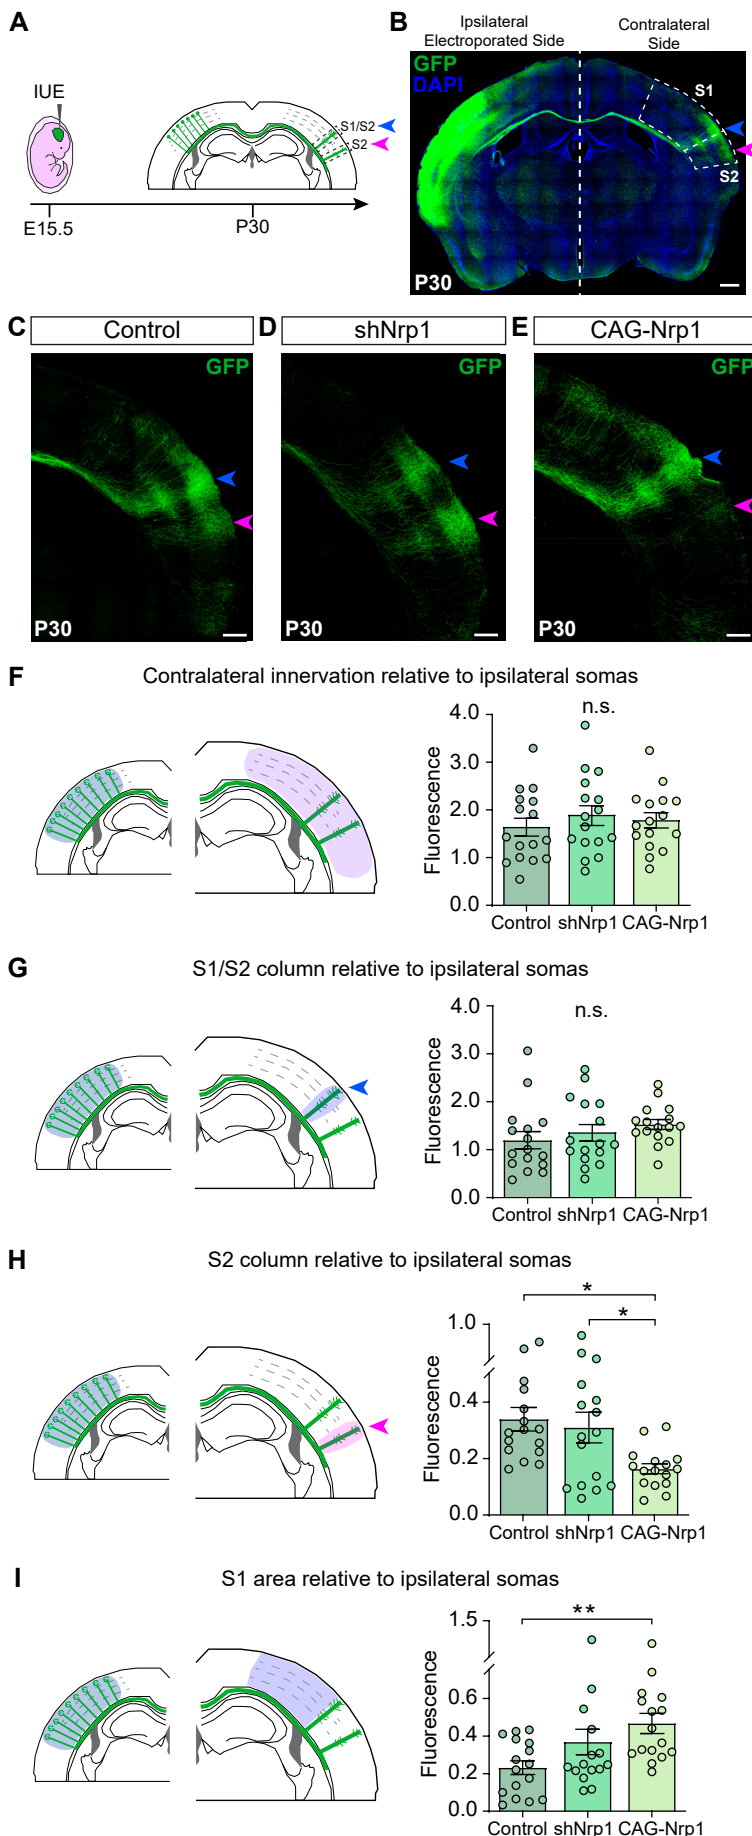

**Figure 1. Analysis of the distribution of callosal axons upon alterations in Nrp1 levels.** **A)** Scheme of the experimental approach. Contralaterally, L2/3 callosal axons form two main axonal columns, the S1/S2 column (blue arrow) and the S2 column (magenta arrow). **B)** Coronal section of P30 control brain electroperated at E15.5 with CAG-GFP. The SS cortex is divided into two functional areas: primary somatosensory cortex (S1) and secondary somatosensory cortex (S2) (dashed boxes). Green = GFP, Blue = DAPI. Scale bar = 500  $\mu$ m. **C-E)** High magnifications of the contralateral hemisphere of P30 IUE brains showing GFP<sup>+</sup> (green) axons of S1/S2 (blue arrow) and S2 columns (magenta arrow). Scale bar = 300  $\mu$ m. **F-I)** Quantification of axonal distribution in the contralateral hemisphere. The left panels depict schemes showing the selected ROIs in which GFP is quantified (shaded areas). Graphs show values of GFP innervation relative to the fluorescence signal in the ipsilateral electroperated side of the same coronal section to normalize to the number of IUE L2/3 neurons. Mean  $\pm$  SEM (n = 8 brains, 2 sections per brain, in all conditions). S1/S2 column (blue arrow), S2 column (magenta arrow). **F)** The innervation in the contralateral SS area. (One-way ANOVA:  $P$ -value = 0.6625 (n.s.)). **G)** S1/S2 column (One-way ANOVA:  $P$ -value = 0.3478 (n.s.)). **H)** S2 column (One-way ANOVA:  $P$ -value = 0.0085 (\*\*). Posthoc with Tukey's test: \*  $p$ -value<sub>Control - CAG-Nrp1</sub> = 0.0106, \*  $p$ -value<sub>shNrp1 - CAG-Nrp1</sub> = 0.0393). **I)** S1 area (One-way ANOVA:  $P$ -value = 0.0129 (\*). Posthoc with Tukey's test: \*\*  $p$ -value<sub>Control - CAG-Nrp1</sub> = 0.0095).

## 136 **Nrp1 levels orchestrate callosal homotopic innervation in the somatosensory areas**

137 We next analyzed the topographic location of the electroporated CPNs projecting to S1  
138 or S2. Using stereotaxic coordinates, we performed classic axonal retrograde tracing by  
139 injecting fluorescent conjugates of cholera toxin subunit B of (CTB-555) in the cortical  
140 plate of the non-electroporated hemisphere. This procedure labels the subset of neurons  
141 projecting to the site of injection (Figure 2A). We injected P28 animals either in the S1  
142 area, at the level of the S1/S2 column (Figure 2A-B), or in the S2 column (Figure 2A and  
143 C), and we analyzed the location of the GFP<sup>+</sup>CTB<sup>+</sup> L2/3 CPNs at P30 (Figure 2A). As a  
144 retrospective control of the injection site, we confirmed that, in addition to cortical  
145 neurons, our injections in the S1/S2 column labeled preferentially thalamic neurons of  
146 the ventral posteromedial nuclei (VPM) (Figure 2 – figure supplement 1A-C), while our  
147 injections in the S2 column labeled neurons of the posterior nucleus (Po) (Figure 2 –  
148 figure supplement 1D-F) (see Methods). After counting the CPNs, we calculated the  
149 relative distribution of CPNs in S1 and S2 to evaluate changes in their contralateral  
150 targeting. For injections in the S1/S2 column, we calculated the ratio of GFP<sup>+</sup>CTB<sup>+</sup>  
151 neurons in S1 vs. the number in S2 (homotopic projections vs. heterotopic projections).  
152 This analysis showed that in controls, most axons that form the S1/S2 column are  
153 homotopic projections from S1 since S1L2/3 CPNs were labeled 1.5 times more  
154 frequently than those in S2 (Figure 2D and J). Although there was a tendency to small  
155 decreases in the labeling of S1 CPNs, we observed no significant changes in shNrp1 or  
156 CAG-Nrp1 populations (Figure 2E-F and J). Hence, S1 innervation is not majorly  
157 affected by our manipulations. For animals injected in the S2 column, we calculated the  
158 ratio of GFP<sup>+</sup>CTB<sup>+</sup> neurons found in S2 (homotopic) vs. those labeled in S1 (heterotopic)  
159 (Figure 2G-I, and K). This analysis showed that in controls, homotopic S2L2/3  
160 projections are the main contributors to the GFP<sup>+</sup> S2 column (2,5 ratio) (Figure 2G and  
161 K). Both knocking down or overexpressing Nrp1 decreased the proportions of S2L2/3  
162 CPNs labeled with CTB injected in contralateral S2 (Figure 2H-I and K). The decreases  
163 observed in shNrp1 IUE brains indicated that their GFP<sup>+</sup> S2 column is formed by an  
164 excess of heterotopic S1L2/3 axons (Figure 1D and H). Thus, the growth of shNrp1  
165 S1L2/3 callosal branches compensates for the loss of Nrp1-deficient homotopic S2L2/3  
166 projections. For the CAG-Nrp1 animals, since we had observed a reduction of the GFP<sup>+</sup>  
167 S2 column (Figure 1E, and H), the data confirmed the loss of homotopic S2L2/3 branches.  
168 These shifts in the distributions of CPNs in shNrp1 and CAG-Nrp1 electroporated brains

169 were not the consequence of differences in labeling efficiency, as we detected no changes  
170 in the distributions of non-electroporated CTB<sup>+</sup> cells between conditions (Figure 2 –  
171 figure supplement 2). In sum, knocking down Nrp1 expression impairs the development  
172 of homotopic S2L2/3 callosal projections but is insufficient to trigger this effect in more  
173 medial S1L2/3 neurons. Contrary, incrementing Nrp1 expression blocks the development  
174 of both S1L2/3 and S2L2/3 branches into S2 equally, resulting in a diminished S2 column  
175 formed by an equilibrated proportion of S1L2/3 and S2L2/3 projections. These findings  
176 demonstrate that the gradient of Nrp1 expression favors homotopic S2L2/3 callosal  
177 connectivity.

**Figure 2**

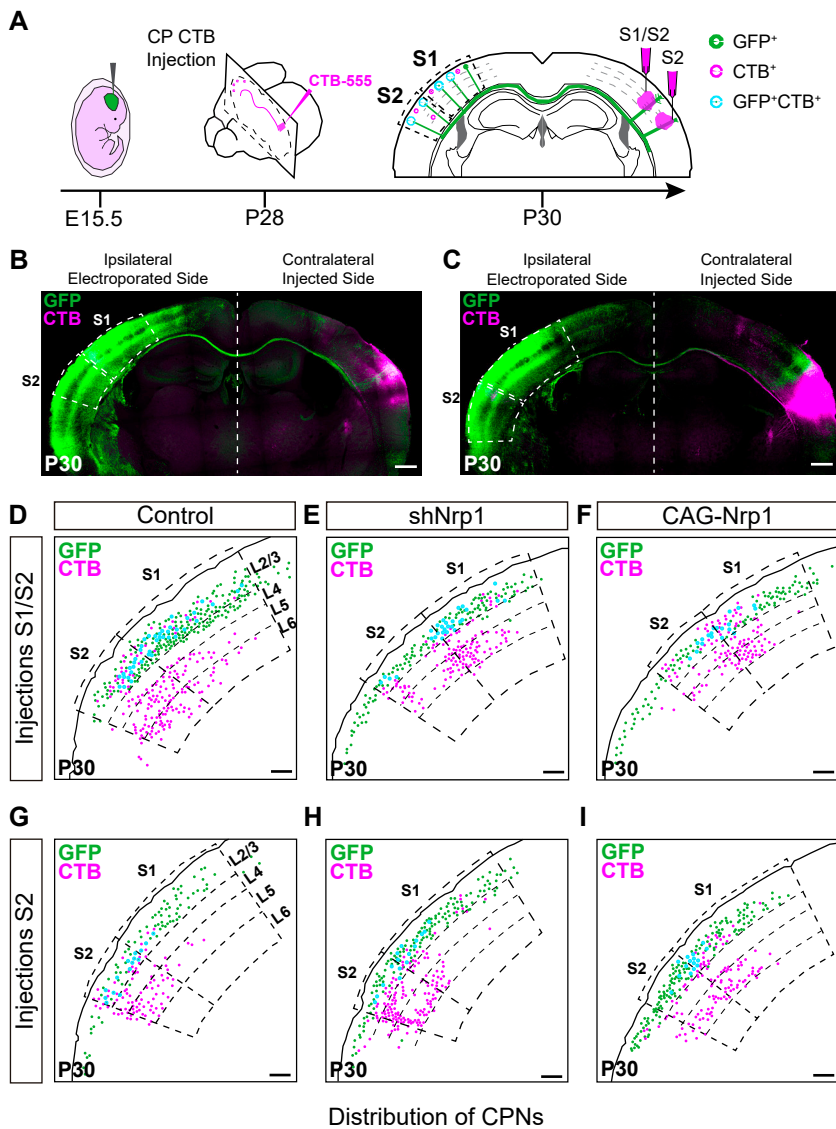

**Figure 2. Analysis of homotopic and heterotopic projections in control, shNrp1, and CAG-Nrp1 IUE brains.** **A)** Experimental workflow. After IUE at E15.5, brains are stereotactically injected with CTB in CP at P28. Separate animals are injected in the S1/S2 column or the S2 column. Then, the numbers of GFP<sup>+</sup>CTB<sup>+</sup> CPNs are quantified in S1 and S2 in the ipsilateral electroporated hemisphere at P30. **B-C)** Tiescan images of P30 coronal sections of control IUE brains injected in S1/S2 (B) or S2 coordinates (C). On the left, the ipsilateral side, where GFP<sup>+</sup> and CTB<sup>+</sup> somas are found. On the right, the contralateral hemisphere, the site of injections. Green = GFP, Magenta = CTB-555. Scale bar = 500 μm. **D-I)** Schemes reporting examples of the location of GFP<sup>+</sup> neurons (green dots), CTB<sup>+</sup> neurons (magenta dots), and GFP<sup>+</sup>CTB<sup>+</sup> (blue dots) in coronal sections of IUE brains injected with CTB in the cortical plate. Scale bar = 300 μm. **J)** Quantification of the distribution of GFP<sup>+</sup>CTB<sup>+</sup> after brains were injected in the S1/S2 column. Ratio (Y-axis) of the number of GFP<sup>+</sup>CTB<sup>+</sup> in S1 divided by the number of GFP<sup>+</sup>CTB<sup>+</sup> cells in S2 quantified in individual sections. Mean ± SEM (n ≥ 3 brains, 2 sections per brain in all conditions. One-way ANOVA: *P*-value = 0.2096 (n.s.)). **K)** Quantification of the distribution of GFP<sup>+</sup>CTB<sup>+</sup> after brains were injected in S2. Ratio (Y-axis) of the number of GFP<sup>+</sup>CTB<sup>+</sup> in S2 divided by the number of GFP<sup>+</sup>CTB<sup>+</sup> cells in S1 quantified in individual sections. Mean ± SEM (n ≥ 3 brains, 2 sections per brain in all conditions. One-way ANOVA: *P*-value = 0.0036 (\*\*). Posthoc with Tukey's test: \*\* *p*-value Control – shNrp1 = 0.0052; \* *p*-value Control – CAG-Nrp1 = 0.0109).

178 **Changes in Nrp1 expression alter developmental growth and refinement of callosal**  
179 **projections**

180 Next, we investigated the mechanisms responsible for the different topography of callosal  
181 connectivity in Nrp1 electroporated P30 brains. To do so, we analyzed the innervation of  
182 P16 electroporated animals and compared them to P30. P16 control electroporated brains  
183 showed recognizable S1/S2 and S2 axonal columns, and quantifications demonstrated a  
184 distribution of contralateral branches very similar to that of P30 animals (Figure 3A, D-  
185 G). In contrast, P16 brains electroporated with shNrp1 or CAG-Nrp1 constructs showed  
186 reduced branching when compared to either P16 or P30 controls (Figure 3A-G). These  
187 reductions were observed throughout all contralateral areas (Figure 3 – figure supplement  
188 1), although they were higher in S2 (Figure 3F). Besides, in controls, contralateral  
189 branches decreased from P16 to P30 (Figure 3D-F) as a consequence of the final pruning  
190 of callosal connections (O’Leary, 1992; De Leon Reyes *et al.*, 2019), but in shNrp1 and  
191 CAG-Nrp1 electroporated brains, axonal growth followed the opposite trend.  
192 Contralateral branches increased in all areas from P16 to P30, except in the S2 of CAG-  
193 Nrp1 brains (Figure 3D-G). Thus, abnormally late postnatal axonal growth compensates  
194 for the delayed contralateral innervation detected at P16, although with an incorrect  
195 topographic organization as revealed by our CTB labeling of CPNs.



**Figure 3**

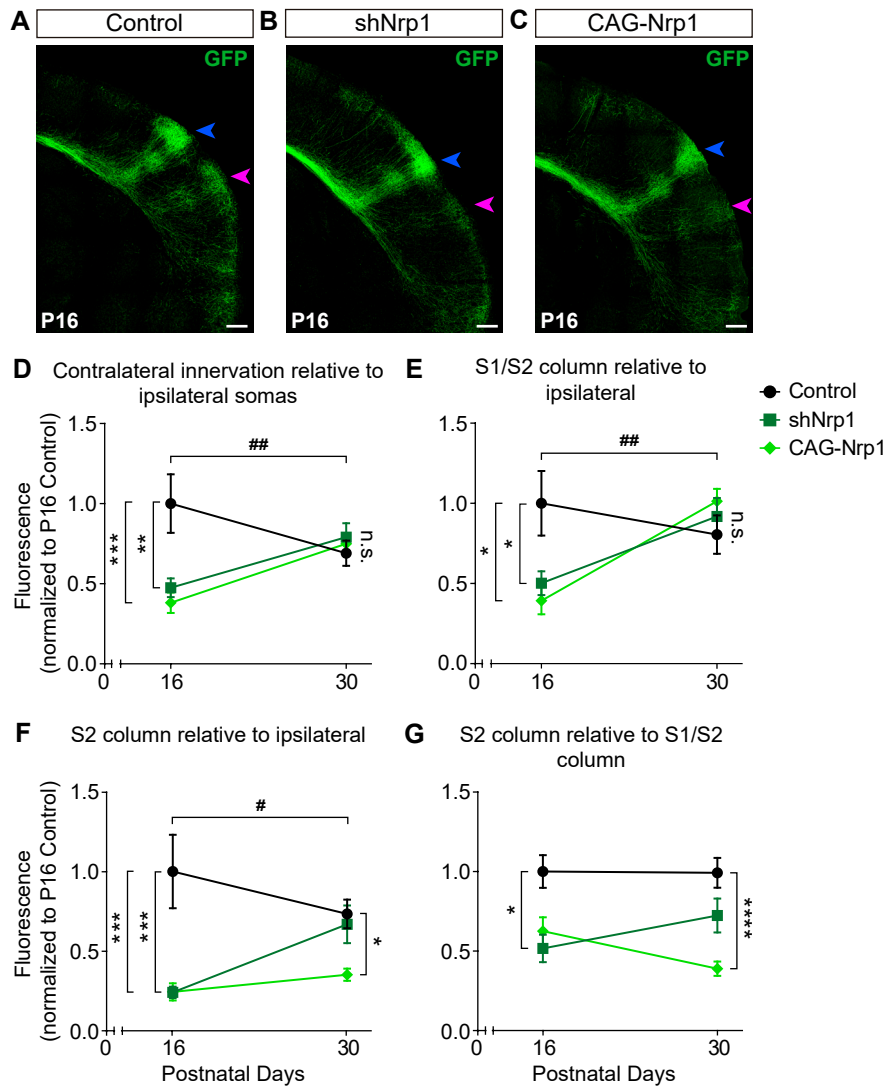

**Figure 3. Comparisons of the postnatal changes of contralateral axons during the P16 to P30 window upon manipulations in Nrp1 expression.** A-C) High magnification tilescan images of the contralateral hemisphere of IUE brains analyzed at P16 (Blue arrow = S1/S2 column. Magenta arrow = S2 column. Green = GFP). Scale bar = 300  $\mu$ m. D-G) Plots of ratios of GFP<sup>+</sup> innervation in the indicated area, relative to ipsilateral IUE hemisphere and normalized to the value of P16 control. Mean  $\pm$  SEM ( $n \geq 4$  brains, 2 sections per brain in all conditions). D) Contralateral innervation in all SS area (Two-way ANOVA:  $P$ -value Dynamics of contralateral innervation = 0.0012 (##);  $P$ -value Postnatal day = 0.1224;  $P$ -value Experimental condition = 0.0149. Posthoc with Tukey's test: \*\*  $p$ -value Control P16 - shNrp1 P16 = 0.0044; \*\*\*  $p$ -value Control P16 - CAG-Nrp1 P16 = 0.0007). E) S1/S2 column (Two-way ANOVA:  $P$ -value Dynamics of S1/S2 column = 0.0052 (##);  $P$ -value Postnatal day = 0.0080;  $P$ -value Experimental condition = 0.2043. Posthoc with Tukey's test: \*  $p$ -value Control P16 - shNrp1 P16 = 0.0465; \*  $p$ -value Control P16 - CAG-Nrp1 P16 = 0.0116). F) S2 column (Two-way ANOVA:  $P$ -value Dynamics of S2 column = 0.0114 (#);  $P$ -value Postnatal day = 0.3331;  $P$ -value Experimental condition < 0.0001. Posthoc with Tukey's test: \*\*\*  $p$ -value Control P16 - shNrp1 P16 = 0.0003; \*\*\*  $p$ -value Control P16 - CAG-Nrp1 P16 = 0.0003; \*  $p$ -value Control P30 - CAG-Nrp1 P30 = 0.0123). G) S2 column relative to S1/S2 column (Two-way ANOVA:  $P$ -value Dynamics S2 column relative to S1/S2 column = 0.2098 (n.s.);  $P$ -value Postnatal day = 0.8770;  $P$ -value Experimental condition < 0.0001. Posthoc with Tukey's test: \*  $p$ -value Control P16 - shNrp1 P16 = 0.0102; \*\*\*\*  $p$ -value Control P30 - CAG-Nrp1 P30 < 0.0001). Data for P30 are from Figure 1 and Figure 1 - Figure supplement 1.



196 **Nrp1 levels determine the postnatal refinement of somatosensory L2/3 callosal axons**  
197 **at the midline**

198 The CC organizes following dorsal-ventral topography. Decreasing Nrp1 expression in  
199 cortical motor neurons shifts callosal axon navigation to the ventral routes used by SS  
200 projections (Zhou *et al.*, 2013). Therefore, we analyzed the distribution of electroporated  
201 axons at the CC midline by quantifying the signal of GFP<sup>+</sup> axons and plotting it against  
202 the dorso-ventral length of the CC divided into ten equal bins (Figure 4A). These analyses  
203 were performed at P16 and P30. In control, shNrp1 and CAG-Nrp1 electroporated brains,  
204 SS callosal projections crossed the midline by the most ventral two-thirds parts of the CC  
205 (bins 1-7) at both developmental stages. Only a few axons navigated by the most dorsal  
206 pathway (bins 7-10) (Figure 4B-I). Control, shNrp1, and CAG-Nrp1 P16 distributions  
207 were very similar, showing small differences in bins 3 and 5 (Figure 4B-E). Differences  
208 increased at P30. GFP<sup>+</sup> callosal axons occupied slightly more dorsal routes (bins 4-10) in  
209 shNrp1 and CAG-Nrp1 electroporated brains than in controls (Figure 4F-I). We then  
210 compared, for each condition, the distributions at P16 and P30. This analysis revealed  
211 developmental changes. It showed that in controls, callosal axons that cross through the  
212 most dorsal paths (bins 3-8) are refined from P16 to P30, which suggests a topographic  
213 developmental elimination of interhemispheric projections (Figure 4B, F and J). This  
214 elimination of midline axons was reduced in shNrp1 electroporated brains, especially of  
215 those using dorsal routes (Figure 4K). Remodeling was not detected in CAG-Nrp1  
216 electroporated brains (Figure 4L). The results suggested that changes in Nrp1 levels  
217 modify the developmental elimination of topographically organized callosal connections.

## Figure 4

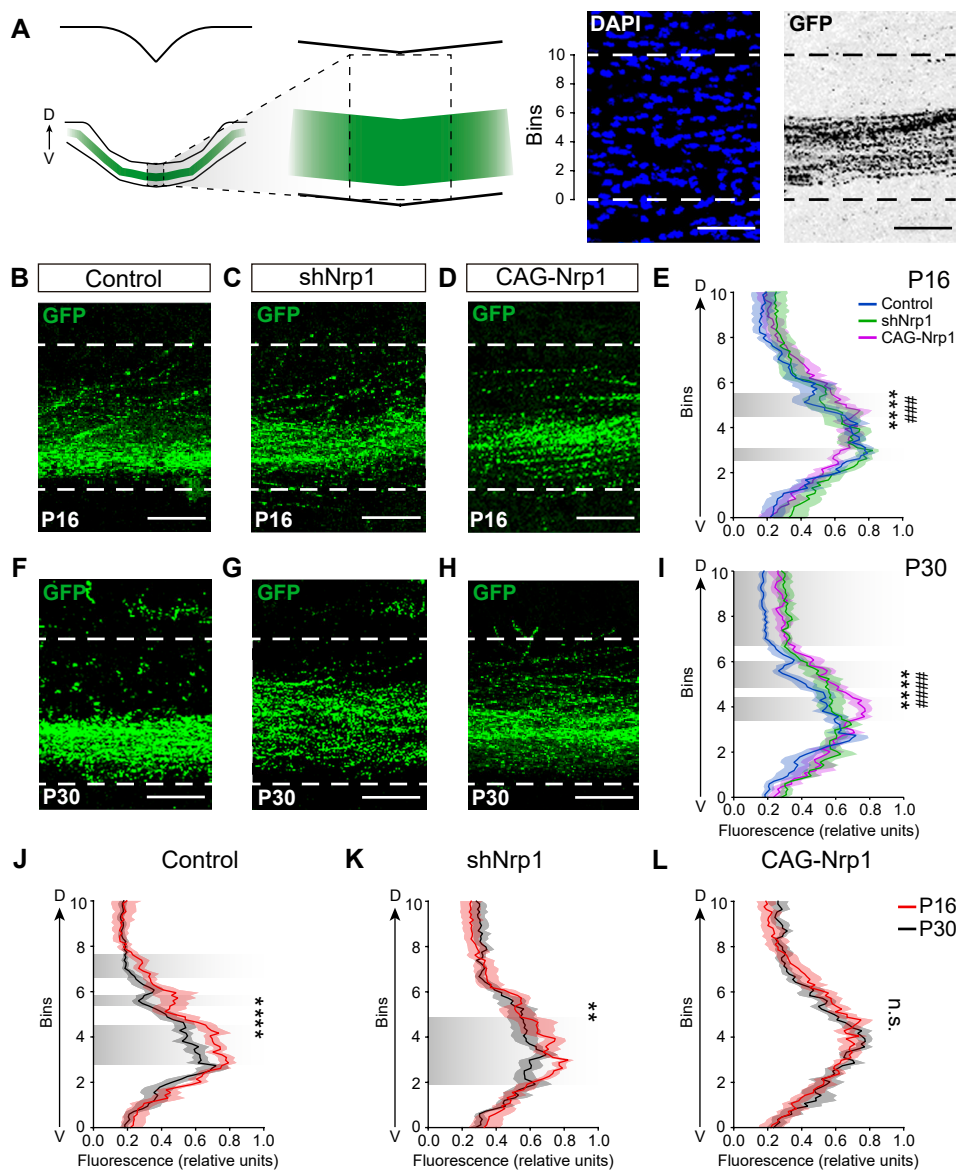

**Figure 4. Analysis of the dorsoventral distribution of axons at the midline.** **A**) Scheme of the analysis. The left panel depicts the selected ROI. The right panel shows the ROI divided into ten equal bins and applied to an image of the midline. DAPI image (blue) and pixels occupied by the GFP axons (grey). Scale bar = 50  $\mu$ m. **B-D**) Images of the CC at the midline in P16 brains. (Green = GFP). Scale bar = 50  $\mu$ m. **E**) Quantification of the dorsoventral distribution of GFP signal at P16 (ventral position, bins 0; dorsal position, bins 10). Lines represent mean  $\pm$  SEM (shade) ( $n \geq 3$  brains, 2 sections per brain in all conditions). Shaded areas in grey indicate statistically significant differences (Two-way ANOVA:  $P$ -value CC distribution = 0.9992;  $P$ -value Bins < 0.0001;  $P$ -value Experimental condition < 0.0001. Posthoc with Tukey's test: \*\*\*\*  $p$ -value Control - shNrp1  $\leq$  0.0001; ###  $p$ -value Control - CAG-Nrp1 = 0.0006). **F-H**) Images of the CC at the midline in P30 brains (Green = GFP). Scale bar = 50  $\mu$ m. **I**) Quantification of the dorsoventral distribution of GFP signal at P30 (ventral position, bins 0; dorsal position, bins 10). Lines represent mean  $\pm$  SEM (shade) ( $n \geq 3$  brains, 2 sections per brain in all conditions). Shaded areas in grey indicate bins showing statistically significant differences (Two-way ANOVA:  $P$ -value CC distribution = 0.9925;  $P$ -value Bins < 0.0001;  $P$ -value Experimental condition < 0.0001. Posthoc with Tukey's test: \*\*\*\*  $p$ -value Control - shNrp1 < 0.0001; #####  $p$ -value Control - CAG-Nrp1 < 0.0001). **J-L**) Comparison of the distributions of axons at the CC in P16 and P30 brains. Lines represent mean  $\pm$  SEM (shade) ( $n \geq 3$  brains, 2 sections per brain in all conditions). J) Control (Two-way ANOVA:  $P$ -value < 0.0001 (\*\*\*\*)). K) shNrp1 (Two-way ANOVA:  $P$ -value = 0.0021 (\*\*)). L) CAG-Nrp1 (Two-way ANOVA:  $P$ -value = 0.5513 (n.s.)).

## 218 **Knocking down Nrp1 eliminates populations of S2L2/3 CPNs by refinement**

219 Our results suggested that Nrp1 influences refinement. We recently showed that as part  
220 of their normal differentiation, L2/3 neurons first develop axons that project callosally,  
221 and subsequently, postnatal activity-dependent refinement eliminates most of these  
222 developmental callosal axons in area-specific manners, thereby selecting the populations  
223 of adult CPNs. The most intensive refinement of L2/3 CPNs occurs during the first two  
224 weeks of postnatal life (P1-P16). From then on, the proportion of L2/3 CPNs is very  
225 similar to that of the adult (De Leon Reyes *et al.*, 2019). To investigate a possible  
226 influence of Nrp1 in developmental CPN refinement, we set to analyze CPN numbers in  
227 the SS cortex of control and Nrp1 electroporated brains at P16 and P30. To this end,  
228 instead of in the cortical plate, we injected CTB-555 directly in the CC in the hemisphere  
229 opposite to the electroporation (Figure 5A-C). This procedure labels all neurons with an  
230 axon crossing the midline, including those in the process of developing or refining their  
231 callosal projections (De Leon Reyes *et al.*, 2019). In controls, after the injections,  
232 quantifications showed proportions of S1L2/3 and S2L2/3 CPNs undistinguishable to  
233 those previously reported in P16 and P30 WT mice, indicating that IUE does not alter  
234 CPN development (Figure 5 – figure supplement 1-2) (Fame *et al.*, 2011; De Leon Reyes  
235 *et al.*, 2019). Refinement of L2/3 CPNs, in both S1 and S2 areas, was not altered upon  
236 overexpression of Nrp1. However, electroporation of shNrp1 modified refinement  
237 (Figure 5 D-I). In P16 control brains, 50% of GFP<sup>+</sup> S1L2/3 neurons were CTB<sup>+</sup> (CPNs)  
238 (Figure 5D and E). This number increased to 65% in shNrp1-targeted S1L2/3 (Figure 5D  
239 and F), indicating that low Nrp1 expression delays axonal refinement. In S2, 40% of GFP<sup>+</sup>  
240 L2/3 cells were CTB<sup>+</sup> in controls or shNrp1 P16 electroporated brains (Figure 5G). Thus,  
241 since the numbers of P16 L2/3CPNs in these brains are equal or higher than in controls,  
242 the reduced GFP<sup>+</sup> innervation that we observed in shNrp1 or CAG-Nrp1 electroporated  
243 brains is due to the scarce branching of GFP<sup>+</sup> L2/3 axons in the contralateral cortical plate.  
244 At P30, 45% of GFP<sup>+</sup> S1L2/3 and around 36% of GFP<sup>+</sup> S2L2/3 control neurons were  
245 CPNs (Figure 5D and G). In shNrp1 P30 brains, the percentage of GFP<sup>+</sup> S1L2/3 CPNs  
246 was indistinguishable from controls (Figure 5D) but the proportion of S2L2/3 CPNs was  
247 significantly reduced (Figure 5G-I). Thus, on the one hand, late postnatal refinement  
248 normalizes the transient increases of P16 S1L2/3 CPNs induced by knocking down Nrp1.  
249 On the other hand, refinement causes the exceeding elimination of S2L2/3 CPNs resulting  
250 in a significant decrease of their final numbers in the mature P30 circuit. Together, the

251 data shows that by regulating axonal growth and refinement, Nrp1 levels determine  
 252 homotopic callosal connectivity.

**Figure 5**

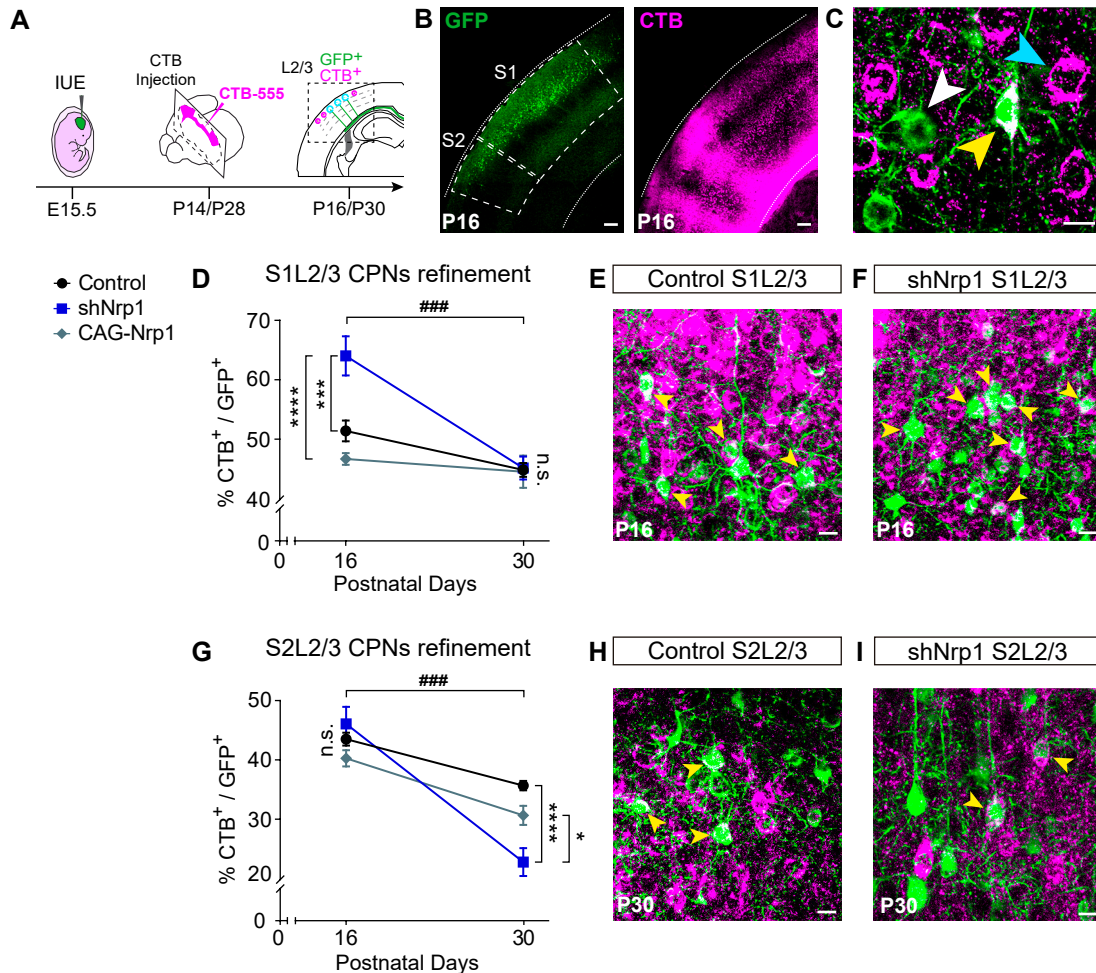

**Figure 5: CPNs refinement during development (P16 to P30).** **A)** Scheme of the experimental workflow. To analyze the effect of developmental refinement on the number of electroporated CPNs, stereotaxic CTB injection at the midline was performed after IUE at E15.5. **B)** Images showing ipsilateral cortex of P16 brains (delimited by dashed lines). Left panel shows GFP<sup>+</sup> electroporated neurons. Right panel shows the signal of CTB labeling axonal columns and somas (Green = GFP. Magenta = CTB-555). Scale bar = 300  $\mu$ m. **C)** High magnification image of GFP<sup>+</sup> L2/3 neurons in an injected P16 brain (GFP<sup>+</sup>, white arrowhead), (CTB<sup>+</sup>, blue arrowhead), (GFP<sup>+</sup>CTB<sup>+</sup>, yellow arrowhead). Scale bar = 10  $\mu$ m. **D)** Plot of the proportion of CPNs (GFP<sup>+</sup>CTB<sup>+</sup>/GFP<sup>+</sup>) in S1 area at P16 and P30. Mean  $\pm$  SEM (n  $\geq$  3 brains, 2 sections per brain in all conditions). (Two-way ANOVA: *P*-value<sub>S1L2/3 CPNs refinement</sub> = 0.0007 (###); *P*-value<sub>Postnatal day</sub> < 0.0001; *P*-value<sub>Experimental condition</sub> = 0.0003. Posthoc with Tukey's test: \*\*\* *p*-value<sub>Control P16 - shNrp1 P16</sub> = 0.0003; \*\*\*\* *p*-value<sub>shNrp1 P16 - CAG-Nrp1 P16</sub> < 0.0001). **E-F)** Merge images of control (E) and shNrp1 (F) S1L2/3 neurons at P16 (GFP<sup>+</sup>CTB<sup>+</sup>, yellow arrowheads). Scale bar = 10  $\mu$ m. **G)** Plot of the proportion of CPNs (GFP<sup>+</sup>CTB<sup>+</sup>/GFP<sup>+</sup>) in S1 area at P16 and P30. Mean  $\pm$  SEM (n  $\geq$  3 brains, 2 sections per brain in all conditions). (Two-way ANOVA: *P*-value<sub>S2L2/3 CPNs refinement</sub> = 0.0003 (###); *P*-value<sub>Postnatal day</sub> < 0.0001; *P*-value<sub>Experimental condition</sub> = 0.0199. Posthoc with Tukey's test: \*\*\*\* *p*-value<sub>Control P30 - shNrp1 P30</sub> < 0.0001; \* *p*-value<sub>shNrp1 P30 - CAG-Nrp1 P30</sub> = 0.0127). **H-I)** Merge images of control (E) and shNrp1 (F) S1L2/3 neurons at P16 (GFP<sup>+</sup>CTB<sup>+</sup>, yellow arrowheads). Scale bar = 10  $\mu$ m.

## 253 Discussion

254 We herein demonstrate that, in the SS cortex, the Nrp1 gradient determines the  
255 topographic organization of SSL2/3 callosal connections. Nrp1 promotes homotopic  
256 branching and hinders heterotopic innervation (Figure 6). Previous studies have shown  
257 that the Nrp1 gradient in the cortex regulates an orderly organization of motor and SS  
258 axons during early postnatal development (Zhou *et al.*, 2013). We find that in addition to  
259 this function, Nrp1 regulates the late growth, branching, and terminal refinement of  
260 callosal axons. S1 and S2 areas process distinct somatosensory information received from  
261 first-order and higher-order thalamic nuclei (Inan and Crair, 2007; Pouchelon *et al.*,  
262 2014). Thus, Nrp1 mediates a hierarchical organization of the bilateral exchange of  
263 sensory inputs. Our findings highlight the complex regulation required for the wiring of  
264 interhemispheric cortical maps.

265 We demonstrate that Nrp1 functions regulate the late development of callosal axonal  
266 branches. Our results argue in favor of possible mechanisms of competition or axonal  
267 cooperation, which are poorly studied in the CC (De León Reyes *et al.*, 2020; Innocenti,  
268 2020). They cannot be merely explained by selective repulsion from the cortical plate,  
269 although they do not discard its contribution. For instance, we observe that knocking  
270 down or overexpressing Nrp1 delays the branching of SSL2/3 callosal axons in the  
271 cortical plate of P16 animals. These reductions are similar in all areas and both conditions,  
272 thus indicating that axons are not simply following a gradient. Instead, these P16 defects  
273 may reflect unbalanced ratios of stabilization/elimination of the synapses of callosal  
274 axons with their targets, which would decrease the rate of productive axonal branching  
275 and slow, but not block, cortical innervation (Courchet *et al.*, 2013). In agreement, shNrp1  
276 and CAG-Nrp1 GFP<sup>+</sup> callosal axons had innervated contralateral areas by P30.  
277 Competition is also suggested by the reconstitution of the S2 column in P30 shNrp1 IUE  
278 brains, which indicates that electroporated S1L2/3 branches outcompete homotopic  
279 S2L2/3 projections in these brains (Figure 6B). By contrast, the reduced P30 GFP<sup>+</sup> S2  
280 column in brains overexpressing Nrp1 is accounted for by the shift of all callosal  
281 projections towards the more medial S1 (Figure 6C). This is not in disagreement with  
282 repulsions, nor with other possible mechanisms. In every case, to dissect the connectivity  
283 produced by our manipulations of Nrp1, it is useful to examine why our manipulations  
284 alter the development of S2L2/3 callosal projections more than S1L2/3 CPNs. This is  
285 likely due to the nature of the endogenous gradient. While overexpressing vectors



286 maximize the levels of Nrp1 equally in all neurons, the effects of shRNA constructs  
287 depend on the endogenous expression of the targeted transcripts and may result in  
288 intermediate and low Nrp1 levels in S1L2/3 and S2L2/3 neurons, respectively (Figure  
289 6B). Accordingly, shNrp1-targeted S1L2/3 CPNs branching in S2 mimic the behavior of  
290 S2L2/3 WT neurons. Unfortunately, we could not assess the levels of Nrp1 protein in  
291 targeted electroporated neurons. In our attempts, antibody staining of Nrp1 did not detect  
292 the protein in the neuronal somas but only in the midline, similarly to other reports (Piper  
293 *et al.*, 2009; Zhao *et al.*, 2011; Zhou *et al.*, 2013; Lim *et al.*, 2015).

294 Hence, the effects of manipulating Nrp1 expression levels agree with that in the canonical  
295 WT circuit, interhemispheric axons from S1 neurons, which express higher levels of  
296 Nrp1, branch more profusely in homotopic S1 areas. Likewise, those projections from S2  
297 CPNs, expressing lower Nrp1 levels, preferentially connect with contralateral homotopic  
298 targets in S2 (Figure 6A) (Yorke and Caviness, 1975; Wise and Jones, 1976; De León  
299 Reyes *et al.*, 2020). Electroporation of shNrp1 diminished homotopic S2L2/3 projections,  
300 which for a fraction of S2L2/3 CPNs, lead to the elimination of their callosal axons. These  
301 neurons presumably become ipsilateral-only projecting neurons, as it occurs to WT S1L4  
302 and most other L2/3 cortical neurons during developmental normal refinement (Innocenti  
303 and Clarke, 1984; O’Leary and Koester, 1993; De Leon Reyes *et al.*, 2019). Interestingly,  
304 the refinement of these CPNs indicates that a certain level of Nrp1 expression is required  
305 for terminal callosal innervation. This again that not support axonal repulsion, may  
306 suggest a disadvantage at a possible axonal competition.

307 Sema3A seems a likely candidate responsible for the late branching phenotypes mediated  
308 by Nrp1. It has a developmental expression gradient opposite to Nrp1. This  
309 complementary expression determines repulsion (Kitsukawa *et al.*, 1997; Zhao *et al.*,  
310 2011; Zhou *et al.*, 2013). In either case, a possible sequential role of Nrp1 in guidance  
311 and refinement is in agreement with observations in the cerebellum, where Nrp1 also has  
312 a dual function (Telley *et al.*, 2016). First, it guides inhibitory axons to their excitatory  
313 neuronal targets, and then, it determines the formation of synapses at specific locations  
314 within the neuronal body. The loss of Nrp1 in presynaptic basket cells blocks the  
315 formation of axonal synapses with Purkinje neurons, which resembles the inability of  
316 those Nrp1 deficient S2L2/3 CPNs to stabilize their callosal projections. In line with the  
317 involvement of Nrp1 signaling in refinement, L2/3 PlexinD1 mutant neurons show

318 abnormal heterotopic callosal projections to the contralateral striatum, possibly due to  
319 deregulated developmental refinement (Velona *et al.*, 2019).

320 In sum, we demonstrate that in the somatosensory cortex, Nrp1 regulates the  
321 developmental postnatal growth and refinement of L2/3 callosal axons. In this manner,  
322 the Nrp1 gradient determines balanced homotopic and heterotopic interhemispheric  
323 connectivity between primary and secondary somatosensory circuits.

Figure 6

**A Nrp1**

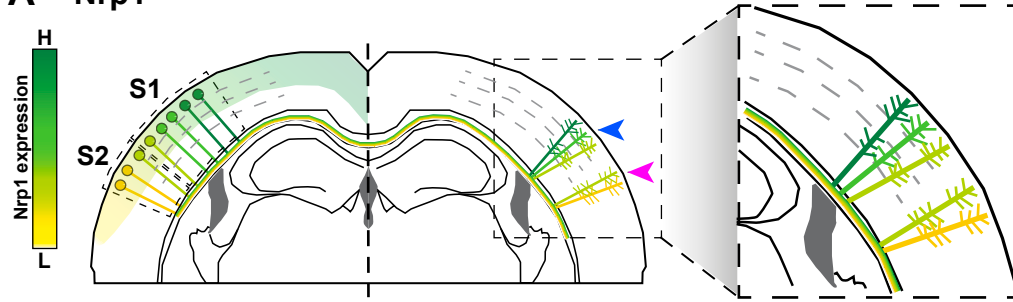

**B shNrp1**

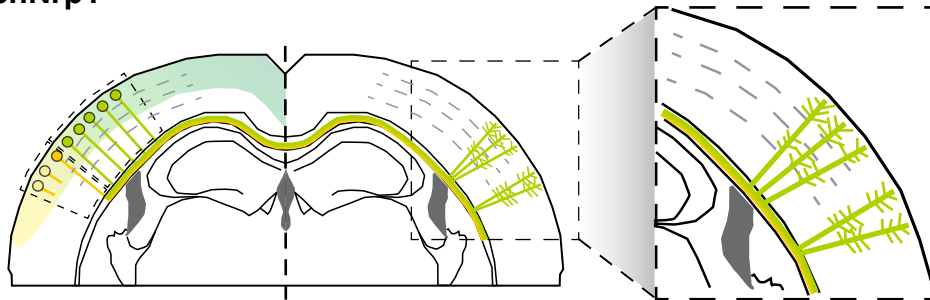

**C CAG-Nrp1**

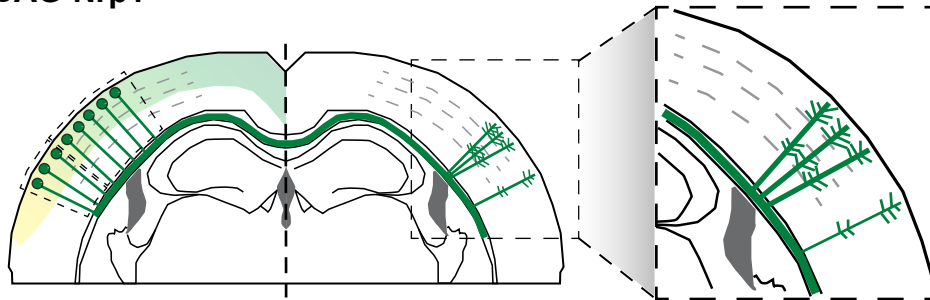

**Figure 6. Model of the effects of Nrp1 levels on callosal connectivity.** A) Nrp1 is expressed in the cortex in a high-medial, to low-lateral, gradient (higher levels in green, lower levels in yellow). Accordingly, S1L2/3 neurons (green dots) express high to intermediate levels of Nrp1. S2L2/3 neurons express low levels (light green and yellow dots). L2/3 neurons expressing high to intermediate levels of Nrp1 branch preferentially in homotopic S1/S2 column (blue arrow), and S2L2/3 neurons expressing intermediate to low levels into S2 areas (magenta arrow). B) Knocking down Nrp1 reduces the levels of Nrp1 according to the gradient. L2/3 CPNs with intermediate levels of Nrp1 expression can branch both in S1/S2 and S2. As consequence, an exceeding number of heterotopic branches from S1L2/3 CPNs outgrowth ectopically in the S2 column. They may outcompete axons of shNrp1 targeted S2L2/3 neurons that express very low levels of Nrp1 (light yellow dots). Many of these S2L2/3 neurons cannot terminate innervation and refine their callosal axon during the late period of P16-P30 developmental CPN refinement, thus becoming ipsilateral-only connecting neurons. C) Neurons over-expressing Nrp1 branch in the S1/S2 column but are not competent to innervate S2 areas, which is then significantly reduced.



## 324 **Methods**

### 325 **Animals**

326 Wild-type (WT) C57BL6JRccHsd (Envigo Laboratories, formerly Harlan. Indianapolis,  
327 the U.S.) mice were used in all experiments. The morning of the day of the appearance of  
328 a vaginal plug was defined as embryonic day 0.5 (E 0.5). Animals were housed and  
329 maintained following the guidelines from the European Union Council Directive  
330 (86/609/European Economic Community). All procedures for handling and sacrificing  
331 complied with all relevant ethical regulations for animal testing and research. All  
332 experiments were performed under the European Commission guidelines (2010/63/EU)  
333 and were approved by the CSIC and the Community of Madrid Ethics Committees on  
334 Animal Experimentation in compliance with national and European legislation (PROEX  
335 124-17; 123-17).

### 336 ***In utero* electroporation and plasmids**

337 Plasmids used were pCAG-GFP (Addgene, plasmid #11150), pCAG-Nrp1 (gift from  
338 Prof. Mu-ming Poo), and shNrp1 in pLKO.1 vector (hairpin sequence:  
339 CCTGCTTTCTTCTCTTGGTTTC. #TRCN0000029859, Merck. Darmstadt. Germany).  
340 *In utero* electroporation was performed as previously described (Briz *et al.*, 2017).  
341 Briefly, a mixture of the specified plasmids at a concentration of 1 µg/µl each (pCAG-  
342 GFP or pCAG-Nrp1) or 0.6 µg/µl (pLKO.1-shNrp1) was injected into the embryo's left  
343 lateral ventricle using pulled glass micropipette. Five voltage pulses (38 mv, 50ms) were  
344 applied using external paddles oriented to target the somatosensory cortex. After birth,  
345 P2 GFP<sup>+</sup> pups were selected and allowed to develop normally until P14 and P28. After  
346 sectioning, analyses were performed only in animals in which the electroporated area  
347 included both S1 and S2.

### 348 **CTB injections for retrograde labeling**

349 Retrograde labeling from the CC and the cortical plate were performed by injecting  
350 subunit B of cholera toxin (CTB) conjugated to Alexa Fluor 555 (#C-34776,  
351 ThermoFisher Scientific. Massachusetts, the U.S.). Injections were performed in the CC,  
352 close to the midline, as previously reported (De Leon Reyes *et al.*, 2019), or in the cortical  
353 plate; in both cases, in the contralateral non-electroporated hemisphere (right  
354 hemisphere). Stereotaxic coordinates, injection volumes, and procedures for different

355 developmental stages for injections in CC were performed as previously described (De  
356 Leon Reyes *et al.*, 2019). For cortical plate injections at P30, stereotaxic coordinates  
357 (anteroposterior (AP), mediolateral (ML), and dorsoventral (DV) axes from Bregma)  
358 were adjusted using the atlas of Paxinos (Paxinos and Franklin, 2004) and used as follow:  
359 S1/S2 injections (-1.34 mm AP; +3.7 mm ML; -0.4 ~ -0.5 mm DV) and, S2 injections (-  
360 1.34 mm AP; +3,7 mm ML; -0.7 ~ -0.8 mm DV); injecting 100 nL of CTB solution at 4  
361 nl s<sup>-1</sup>. Animals were anesthetized during the surgical procedure with isoflurane/oxygen  
362 and placed on a stereotaxic apparatus (Harvard Apparatus. Massachusetts, the U.S.). CTB  
363 particles (diluted at 0.5% in phosphate-buffered saline (PBS)) were injected with a  
364 Drummond Nanoject II Auto-Nanoliter Injector using 30 mm pulled glass micropipettes  
365 (3000205A and 3000203G/X. Drummond Scientific Co. Pennsylvania, the U.S.). Mice  
366 were intrapericardially perfused with formalin two days after the surgery and brains were  
367 extracted and fixed overnight in formalin at 4°C. After fixation, brains were cryoprotected  
368 with 30% sucrose (#S0389. Merck. Darmstadt. Germany) and frozen in Tissue-Tek®  
369 O.C.T.<sup>TM</sup> Compound (#4583, Sakura Tissue-Tek. Tokyo. Japan).

### 370 **Immunohistochemistry**

371 50 µm free-floating brain cryosections were used for immunofluorescence. Rabbit  
372 polyclonal anti-GFP (#A11122, Thermo Fisher Scientific. Invitrogen. Massachusetts, the  
373 U.S.) was used as primary antibody and goat anti-rabbit-Alexa 488 (#A11034, Thermo  
374 Fisher Scientific. Life Technologies. Massachusetts, the U.S.) as the secondary antibody.  
375 Nuclei were stained with 4',6-diamidino-2-phenylindole (DAPI) (#D9542, Merck.  
376 Darmstadt. Germany).

### 377 **Confocal imaging and quantification**

378 Confocal microscopy was performed using a TCS-SP5 (Leica. Wetzlar. Germany) Laser  
379 Scanning System on Leica DMI8 microscopes. Up to 50 µm optical z-sections were  
380 obtained by taking 3.5 µm serial sections with LAS AF v1.8 software (Leica. Wetzlar.  
381 Germany). Tilescan mosaic images were reconstructed with Leica LAS AF software. All  
382 images were acquired using a 512 x 512 scan format with a 20x objective.

383 For the acquisition and quantifications of the fluorescence signal (Rodriguez-Tornos *et*  
384 *al.*, 2016; Briz *et al.*, 2017), detectors were set to ensure equivalent threshold and signal-  
385 to-noise ratios between all samples. The maximum threshold signal was set by ensuring  
386 that no pixels were saturated. The threshold for background noise was determined using

387 regions outside of the electroporated area (Rodriguez-Tornos *et al.*, 2016; Briz *et al.*,  
388 2017). This approach ensures linearity between samples. Quantification of innervation  
389 was performed in tilescan images of electroporated (ipsilateral) and non-electroporated  
390 (contralateral) hemispheres. Different areas were measured delimitating manually ROIs,  
391 adjusting the threshold above the noise (making a binary image), and measuring the  
392 integrated density (using Fiji-ImageJ (Schindelin *et al.*, 2012)). Measures of contralateral  
393 ROIs were normalized to ipsilateral ones to avoid any differences in electroporation  
394 efficiency. Contralateral normalizations, without considering ipsilateral signal, were  
395 calculated to confirm the results. To quantify CC fasciculation, a midline ROI was  
396 selected to measure the fluorescence profile throughout ten equal distance bins. The  
397 different profiles were plotted to identify changes in dorsoventral routes.

398 Quantification of CTB<sup>+</sup> over GFP<sup>+</sup> cells in the primary (S1) and secondary (S2)  
399 somatosensory areas was performed on single plane confocal images from z-stacks (De  
400 Leon Reyes *et al.*, 2019). The proportions of CTB<sup>+</sup> cells were calculated among randomly  
401 selected GFP<sup>+</sup> cells in the ipsilateral (electroporated) hemisphere. For quantification of  
402 GFP<sup>-</sup> populations, the proportions of CTB<sup>+</sup> cells were calculated over randomly selected  
403 DAPI<sup>+</sup> cells, excluding GFP<sup>+</sup> cells. Functional areas of the adult mouse brain were  
404 identified using the atlas of Paxinos (Paxinos and Franklin, 2004).

#### 405 **Statistical analysis**

406 Sample size was determined to be adequate based on the magnitude and consistency of  
407 measurable differences between groups. Each experimental condition was carried out  
408 with a minimum of three biological replicates, a minimum of two sections from each  
409 brain, and included a minimum total number of 300 counted cells. During experiments,  
410 investigators were not blinded to the electroporation condition of animals. Results are  
411 expressed as the mean  $\pm$  standard error of the mean (SEM). Results were compared using  
412 two-way ANOVA and one-way ANOVA with posthoc comparison with Tukey and  
413 Bonferroni's tests. Statistical tests were performed using Prism 8 software (GraphPad  
414 Software. California, the U.S.).

415 **Article and author information**

416 Author details:

417 **F. Martín-Fernández**

418 National Center of Biotechnology. Consejo Superior de Investigaciones Científicas.  
419 CNB-CSIC. Spain.

420 Contribution: conceptualization, formal analysis, validation, investigation, visualization,  
421 methodology, writing.

422 **C. García-Briz**

423 National Center of Biotechnology. Consejo Superior de Investigaciones Científicas.  
424 CNB-CSIC. Spain. Present address: Ministry of Consumer Affairs. Spain Govern.

425 Contribution: conceptualization, investigation, methodology.

426 **M. Nieto**

427 National Center of Biotechnology. Consejo Superior de Investigaciones Científicas.  
428 CNB-CSIC. Spain.

429 Contribution: conceptualization, writing.

430 **Acknowledgments**

431 We are grateful to R. Gutierrez, A. Morales, S. Gutiérrez-Erlandsson, and A. Oña for  
432 technical assistance. J. García-Marqués, L.A. Weiss, N. S. de León, I. Varela, E. Marcos,  
433 and L. Bragg for critical reading and advice. F. Martín-Fernández holds an FPU  
434 fellowship from the Spanish MEFP, FPU15/02111. C. García-Briz was supported by a  
435 fellowship from the Spanish MICINN, FPI-BES-2012-056011. This work was funded by  
436 grants from the Ministerio de Ciencia, Innovación y Universidades/Agencia Estatal de  
437 Investigación/Fondo Europeo de Desarrollo Regional, European Union (SAF2017-  
438 83117-R and RED2018-102553T).

439 **Competing Interests**

440 The authors declare no competing interests.

## 441 **References**

- 442 Aboitiz, F. and Montiel, J. (2003) "One hundred million years of interhemispheric  
443 communication: the history of the corpus callosum", *Braz J Med Biol Res*, 36(4), pp.  
444 409–20. doi:10.1590/s0100-879x2003000400002.
- 445 Antón-Bolaños, N., Sempere-Ferrández, A., Guillamón-Vivancos, T., Martini, F. J.,  
446 Pérez-Saiz, L., Gezelius, H., Filipchuk, A., Valdeolmillos, M. and López-Bendito, G.  
447 (2019) "Prenatal activity from thalamic neurons governs the emergence of functional  
448 cortical maps in mice", *Science*, 364(6444), pp. 987–990. doi:10.1126/science.aav7617.
- 449 Briz, C. G., Navarrete, M., Esteban, J. A. and Nieto, M. (2017) "In Utero  
450 Electroporation Approaches to Study the Excitability of Neuronal Subpopulations and  
451 Single-cell Connectivity", *J Vis Exp*, (120). doi:10.3791/55139.
- 452 Courchet, J., Lewis, T. L., Lee, S., Courchet, V., Liou, D.-Y., Aizawa, S. and Polleux,  
453 F. (2013) "Terminal Axon Branching Is Regulated by the LKB1-NUAK1 Kinase  
454 Pathway via Presynaptic Mitochondrial Capture", *Cell*, 153(7), pp. 1510–1525.  
455 doi:10.1016/j.cell.2013.05.021.
- 456 De León Reyes, N. S., Bragg-Gonzalo, L. and Nieto, M. (2020) "Development and  
457 plasticity of the corpus callosum", *Development (Cambridge, England)*, 147(18).  
458 doi:10.1242/dev.189738.
- 459 De Leon Reyes, N. S., Mederos, S., Varela, I., Weiss, L. A., Perea, G., Galazo, M. J.  
460 and Nieto, M. (2019) "Transient callosal projections of L4 neurons are eliminated for  
461 the acquisition of local connectivity", *Nat Commun*, 10(1), p. 4549.  
462 doi:10.1038/s41467-019-12495-w.
- 463 Dehay, C., Kennedy, H. and Bullier, J. (1986) "Callosal connectivity of areas V1 and  
464 V2 in the newborn monkey", *The Journal of Comparative Neurology*, 254(1), pp. 20–  
465 33. doi:10.1002/cne.902540103.
- 466 Fame, R. M., MacDonald, J. L. and Macklis, J. D. (2011) "Development, specification,  
467 and diversity of callosal projection neurons", *Trends Neurosci*, 34(1), pp. 41–50.  
468 doi:10.1016/j.tins.2010.10.002.
- 469 Fenlon, L. R. and Richards, L. J. (2015) "Contralateral targeting of the corpus callosum  
470 in normal and pathological brain function", *Trends Neurosci*, 38(5), pp. 264–72.  
471 doi:10.1016/j.tins.2015.02.007.
- 472 Fenlon, L. R., Suárez, R. and Richards, L. J. (2017) "The anatomy, organisation and  
473 development of contralateral callosal projections of the mouse somatosensory cortex",  
474 *Brain and Neuroscience Advances*, 1, p. 239821281769488.  
475 doi:10.1177/2398212817694888.
- 476 Fournier, A. E., Nakamura, F., Kawamoto, S., Goshima, Y., Kalb, R. G. and  
477 Strittmatter, S. M. (2000) "Semaphorin3A enhances endocytosis at sites of receptor-F-  
478 actin colocalization during growth cone collapse", *J Cell Biol*, 149(2), pp. 411–22.  
479 doi:10.1083/jcb.149.2.411.

- 480 Gu, C., Rodriguez, E. R., Reimert, D. V., Shu, T., Fritzsich, B., Richards, L. J.,  
481 Kolodkin, A. L. and Ginty, D. D. (2003) "Neuropilin-1 conveys semaphorin and VEGF  
482 signaling during neural and cardiovascular development", *Dev Cell*, 5(1), pp. 45–57.  
483 doi:10.1016/s1534-5807(03)00169-2.
- 484 Hatanaka, Y., Matsumoto, T., Yanagawa, Y., Fujisawa, H., Murakami, F. and Masu, M.  
485 (2009) "Distinct roles of neuropilin 1 signaling for radial and tangential extension of  
486 callosal axons", *J Comp Neurol*, 514(3), pp. 215–25. doi:10.1002/cne.22021.
- 487 Hill, R. S. and Walsh, C. A. (2005) "Molecular insights into human brain evolution",  
488 *Nature*, 437(7055), pp. 64–7. doi:10.1038/nature04103.
- 489 Huang, Y., Song, N.-N., Lan, W., Zhang, Q., Zhang, Ling, Zhang, Lei, Hu, L., Chen, J.-  
490 Y., Zhao, C.-J., Li, L., Xu, L. and Ding, Y.-Q. (2013) "Sensory input is required for  
491 callosal axon targeting in the somatosensory cortex", *Molecular Brain*, 6, p. 53.  
492 doi:10.1186/1756-6606-6-53.
- 493 Inan, M. and Crair, M. C. (2007) "Development of cortical maps: perspectives from the  
494 barrel cortex", *The Neuroscientist: A Review Journal Bringing Neurobiology,*  
495 *Neurology and Psychiatry*, 13(1), pp. 49–61. doi:10.1177/1073858406296257.
- 496 Innocenti, G. M. (2020) "The Target of Exuberant Projections in Development",  
497 *Cerebral Cortex*, 30(6), pp. 3820–3826. doi:10.1093/cercor/bhz344.
- 498 Innocenti, G. M. and Clarke, S. (1984) "The organization of immature callosal  
499 connections", *J Comp Neurol*, 230(2), pp. 287–309. doi:10.1002/cne.902300212.
- 500 Innocenti, G. M. and Price, D. J. (2005) "Exuberance in the development of cortical  
501 networks", *Nature Reviews Neuroscience*, 6(12), pp. 955–965. doi:10.1038/nrn1790.
- 502 Kitsukawa, T., Shimizu, M., Sanbo, M., Hirata, T., Taniguchi, M., Bekku, Y., Yagi, T.  
503 and Fujisawa, H. (1997) "Neuropilin-semaphorin III/D-mediated chemorepulsive  
504 signals play a crucial role in peripheral nerve projection in mice", *Neuron*, 19(5), pp.  
505 995–1005. doi:10.1016/s0896-6273(00)80392-x.
- 506 Koralek, K. A. and Killackey, H. P. (1990) "Callosal projections in rat somatosensory  
507 cortex are altered by early removal of afferent input.", *Proceedings of the National*  
508 *Academy of Sciences*. National Academy of Sciences, 87(4), pp. 1396–1400.  
509 doi:10.1073/pnas.87.4.1396.
- 510 Lim, J. W. C., Donahoo, A.-L. S., Bunt, J., Edwards, T. J., Fenlon, L. R., Liu, Y., Zhou,  
511 J., Moldrich, R. X., Piper, M., Gobius, I., Bailey, T. L., Wray, N. R., Kessar, N., Poo,  
512 M.-M., Rubenstein, J. L. R. and Richards, L. J. (2015) "EMX1 regulates NRP1-  
513 mediated wiring of the mouse anterior cingulate cortex", *Development (Cambridge,*  
514 *England)*, 142(21), pp. 3746–3757. doi:10.1242/dev.119909.
- 515 Meissirel, C., Dehay, C., Berland, M. and Kennedy, H. (1991) "Segregation of callosal  
516 and association pathways during development in the visual cortex of the primate", *The*  
517 *Journal of Neuroscience*, 11(11), pp. 3297–3316. doi:10.1523/JNEUROSCI.11-11-  
518 03297.1991.



- 519 Miller, M. W. and Vogt, B. A. (1984) "Heterotopic and homotopic callosal connections  
520 in rat visual cortex", *Brain Research*, 297(1), pp. 75–89. doi:10.1016/0006-  
521 8993(84)90544-4.
- 522 Mire, E., Hocine, M., Bazellières, E., Jungas, T., Davy, A., Chauvet, S. and Mann, F.  
523 (2018) "Developmental Upregulation of Ephrin-B1 Silences Sema3C/Neuropilin-1  
524 Signaling during Post-crossing Navigation of Corpus Callosum Axons", *Current*  
525 *biology: CB*, 28(11), pp. 1768-1782.e4. doi:10.1016/j.cub.2018.04.026.
- 526 Mitchell, B. D. and Macklis, J. D. (2005) "Large-scale maintenance of dual projections  
527 by callosal and frontal cortical projection neurons in adult mice", *J Comp Neurol*,  
528 482(1), pp. 17–32. doi:10.1002/cne.20428.
- 529 Mizuno, H., Hirano, T. and Tagawa, Y. (2007) "Evidence for Activity-Dependent  
530 Cortical Wiring: Formation of Interhemispheric Connections in Neonatal Mouse Visual  
531 Cortex Requires Projection Neuron Activity", *Journal of Neuroscience*. Society for  
532 Neuroscience, 27(25), pp. 6760–6770. doi:10.1523/JNEUROSCI.1215-07.2007.
- 533 Muche, A., Bigl, M., Arendt, T. and Schliebs, R. (2015) "Expression of vascular  
534 endothelial growth factor (VEGF) mRNA, VEGF receptor 2 (Flk-1) mRNA, and of  
535 VEGF co-receptor neuropilin (Nrp)-1 mRNA in brain tissue of aging Tg2576 mice by  
536 in situ hybridization", *International Journal of Developmental Neuroscience*, 43(1), pp.  
537 25–34. doi:<https://doi.org/10.1016/j.ijdevneu.2015.03.003>.
- 538 Niquille, M., Garel, S., Mann, F., Hornung, J. P., Otsmane, B., Chevalley, S., Parras, C.,  
539 Guillemot, F., Gaspar, P., Yanagawa, Y. and Lebrand, C. (2009) "Transient neuronal  
540 populations are required to guide callosal axons: a role for semaphorin 3C", *PLoS Biol*,  
541 7(10), p. e1000230. doi:10.1371/journal.pbio.1000230.
- 542 O’Leary, D. D. M. (1992) "Development of connectional diversity and specificity in the  
543 mammalian brain by the pruning of collateral projections", *Current Opinion in*  
544 *Neurobiology*, 2(1), pp. 70–77. doi:10.1016/0959-4388(92)90165-H.
- 545 O’Leary, D. D. M. and Koester, S. E. (1993) "Development of projection neuron types,  
546 axon pathways, and patterned connections of the mammalian cortex", *Neuron*, 10(6),  
547 pp. 991–1006. doi:10.1016/0896-6273(93)90049-W.
- 548 Paxinos, G. and Franklin, K. B. J. (2004) *The mouse brain in stereotaxic coordinates* (1  
549 vol). Compact 2nd. Amsterdam ; Boston: Elsevier Academic Press.
- 550 Piper, M., Plachez, C., Zalucki, O., Fothergill, T., Goudreau, G., Erzurumlu, R., Gu, C.  
551 and Richards, L. J. (2009) "Neuropilin 1-Sema signaling regulates crossing of cingulate  
552 pioneering axons during development of the corpus callosum", *Cereb Cortex*, 19 Suppl  
553 1, pp. i11-21. doi:10.1093/cercor/bhp027.
- 554 Pouchelon, G., Gambino, F., Bellone, C., Telley, L., Vitali, I., Lüscher, C., Holtmaat, A.  
555 and Jabaudon, D. (2014) "Modality-specific thalamocortical inputs instruct the identity  
556 of postsynaptic L4 neurons", *Nature*, 511(7510), pp. 471–474.  
557 doi:10.1038/nature13390.
- 558 Rakic, P. (1988) "Specification of cerebral cortical areas", *Science*, 241(4862), pp. 170–  
559 6. doi:10.1126/science.3291116.

- 560 Rodriguez-Tornos, F. M., Briz, C. G., Weiss, L. A., Sebastian-Serrano, A., Ares, S.,  
561 Navarrete, M., Frangeul, L., Galazo, M., Jabaudon, D., Esteban, J. A. and Nieto, M.  
562 (2016) "Cux1 Enables Interhemispheric Connections of Layer II/III Neurons by  
563 Regulating Kv1-Dependent Firing", *Neuron*, 89(3), pp. 494–506.  
564 doi:10.1016/j.neuron.2015.12.020.
- 565 Schindelin, J., Arganda-Carreras, I., Frise, E., Kaynig, V., Longair, M., Pietzsch, T.,  
566 Preibisch, S., Rueden, C., Saalfeld, S., Schmid, B., Tinevez, J.-Y., White, D. J.,  
567 Hartenstein, V., Eliceiri, K., Tomancak, P. and Cardona, A. (2012) "Fiji: an open-source  
568 platform for biological-image analysis", *Nature Methods*, 9(7), pp. 676–682.  
569 doi:10.1038/nmeth.2019.
- 570 Stanfield, B. B., O’Leary, D. D. M. and Fricks, C. (1982) "Selective collateral  
571 elimination in early postnatal development restricts cortical distribution of rat pyramidal  
572 tract neurones", *Nature*, 298(5872), pp. 371–373. doi:10.1038/298371a0.
- 573 Suárez, R., Fenlon, L. R., Marek, R., Avitan, L., Sah, P., Goodhill, G. J. and Richards,  
574 L. J. (2014) "Balanced interhemispheric cortical activity is required for correct targeting  
575 of the corpus callosum", *Neuron*, 82(6), pp. 1289–1298.  
576 doi:10.1016/j.neuron.2014.04.040.
- 577 Suarez, R., Gobijs, I. and Richards, L. J. (2014) "Evolution and development of  
578 interhemispheric connections in the vertebrate forebrain", *Front Hum Neurosci*, 8, p.  
579 497. doi:10.3389/fnhum.2014.00497.
- 580 Takahashi, T., Fournier, A., Nakamura, F., Wang, L. H., Murakami, Y., Kalb, R. G.,  
581 Fujisawa, H. and Strittmatter, S. M. (1999) "Plexin-neuropilin-1 complexes form  
582 functional semaphorin-3A receptors", *Cell*, 99(1), pp. 59–69. doi:10.1016/s0092-  
583 8674(00)80062-8.
- 584 Tamamaki, N., Fujimori, K., Nojyo, Y., Kaneko, T. and Takauji, R. (2003) "Evidence  
585 that *Sema3A* and *Sema3F* regulate the migration of GABAergic neurons in the  
586 developing neocortex", *Journal of Comparative Neurology*, 455(2), pp. 238–248.  
587 doi:<https://doi.org/10.1002/cne.10476>.
- 588 Tolley, L., Cadilhac, C., Cioni, J.-M., Saywell, V., Jahannault-Talignani, C., Huettl, R.  
589 E., Sarrailh-Faivre, C., Dayer, A., Huber, A. B. and Ango, F. (2016) "Dual Function of  
590 NRP1 in Axon Guidance and Subcellular Target Recognition in Cerebellum", *Neuron*,  
591 91(6), pp. 1276–1291. doi:10.1016/j.neuron.2016.08.015.
- 592 Velona, T., Altounian, M., Roque, M., Hocine, M., Bellon, A., Briz, C. G., Salin, P.,  
593 Nieto, M., Chauvet, S. and Mann, F. (2019) "PlexinD1 and *Sema3E* determine laminar  
594 positioning of heterotopically projecting callosal neurons", *Molecular and Cellular  
595 Neuroscience*, 100, p. 103397. doi:10.1016/j.mcn.2019.103397.
- 596 Watson, C. (2012) "Chapter 21 - The Somatosensory System", in Watson, C., Paxinos,  
597 G., and Puelles, L. (eds.) *The Mouse Nervous System*. San Diego: Academic Press, pp.  
598 563–570.
- 599 Wise, S. P. and Jones, E. G. (1976) "The organization and postnatal development of the  
600 commissural projection of the rat somatic sensory cortex", *J Comp Neurol*, 168(3), pp.  
601 313–43. doi:10.1002/cne.901680302.



- 602 Wu, K. Y., He, M., Hou, Q. Q., Sheng, A. L., Yuan, L., Liu, F., Liu, W. W., Li, G.,  
603 Jiang, X. Y. and Luo, Z. G. (2014) "Semaphorin 3A activates the guanosine  
604 triphosphatase Rab5 to promote growth cone collapse and organize callosal axon  
605 projections", *Sci Signal*, 7(340), p. ra81. doi:10.1126/scisignal.2005334.
- 606 Yorke, C. H. and Caviness, V. S. (1975) "Interhemispheric neocortical connections of  
607 the corpus callosum in the normal mouse: a study based on anterograde and retrograde  
608 methods", *J Comp Neurol*, 164(2), pp. 233–45. doi:10.1002/cne.901640206.
- 609 Zhao, H., Maruyama, T., Hattori, Y., Sugo, N., Takamatsu, H., Kumanogoh, A.,  
610 Shirasaki, R. and Yamamoto, N. (2011) "A molecular mechanism that regulates  
611 medially oriented axonal growth of upper layer neurons in the developing neocortex", *J*  
612 *Comp Neurol*, 519(5), pp. 834–48. doi:10.1002/cne.22536.
- 613 Zhou, J., Wen, Y., She, L., Sui, Y. N., Liu, L., Richards, L. J. and Poo, M. M. (2013)  
614 "Axon position within the corpus callosum determines contralateral cortical projection",  
615 *Proc Natl Acad Sci U S A*, 110(29), pp. E2714-23. doi:10.1073/pnas.1310233110.

## Figure 1 - figure supplement 1

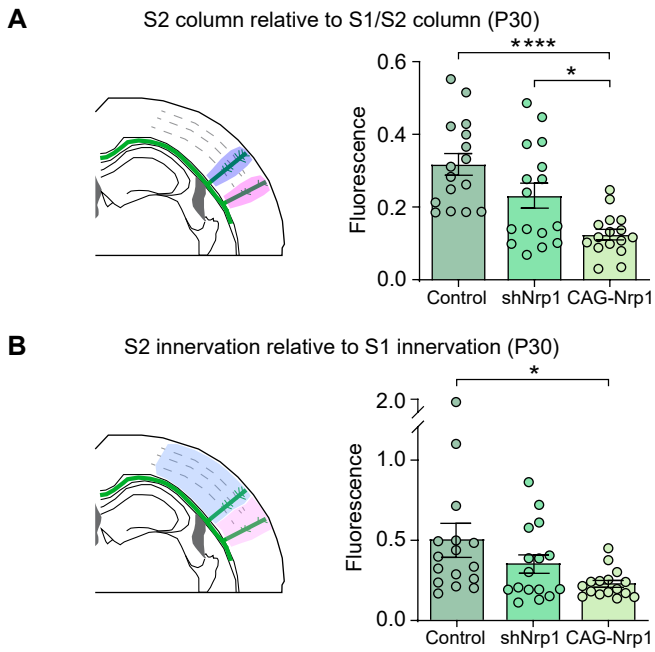

**Figure 1 – figure supplement 1. Analysis of contralateral innervation of SS cortex at P30 upon Nrp1 modifications. A-B)** Quantification of axonal distribution in the contralateral hemisphere. The left panels depict schemes showing the selected ROIs in which GFP<sup>+</sup> is quantified (shaded areas). Graphs show values of relative contralateral GFP innervation. Mean  $\pm$  SEM (n = 8 brains, 2 sections per brain, in all conditions). A) S2 column relative to S1/S2 column (One-way ANOVA:  $P$ -value < 0.0001. Post-hoc with Tukey's test: \*\*\*\*  $p$ -value<sub>Control - CAG-Nrp1</sub> < 0.0001; \*  $p$ -value<sub>shNrp1 - CAG-Nrp1</sub> = 0.0231). B) S2 innervation relative to S1 innervation (One-way ANOVA:  $P$ -value = 0.0329 Posthoc with Tukey's test: \*  $p$ -value<sub>Control - CAG-Nrp1</sub> = 0.0252).

## Figure 1 - figure supplement 2

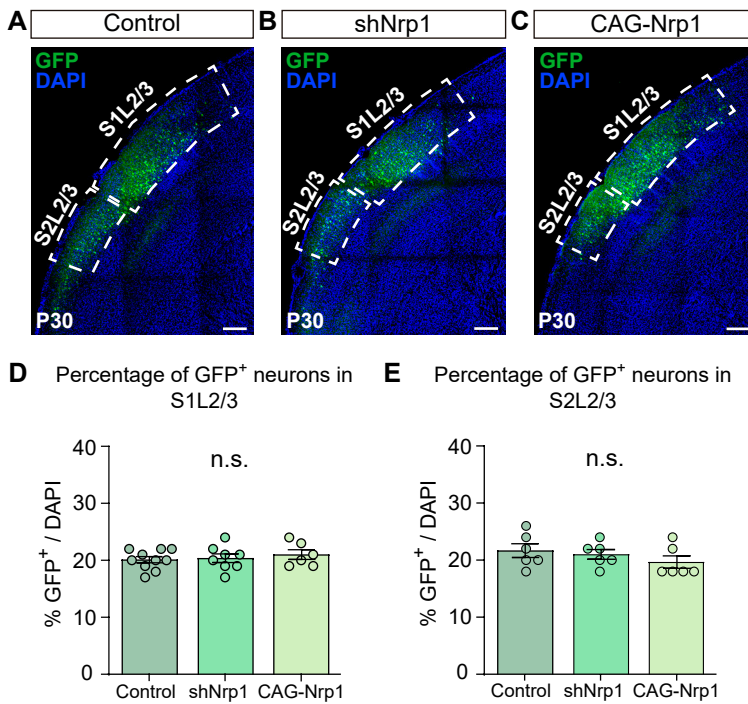

**Figure 1 – figure supplement 2. Analysis of proportions of GFP<sup>+</sup> electroporated neurons in the ipsilateral side in somatosensory areas.** A-C) Detail of the ipsilateral hemisphere of P30 electroporated brains from all conditions (Dashed boxes: S1L2/3 electroporated area and S2L2/3 electroporated area). Scale bar = 300  $\mu$ m. **D-E**) Percentage of GFP<sup>+</sup> neurons over cells (DAPI<sup>+</sup>) in S1L2/3 and S2L2/3. Mean  $\pm$  SEM ( $n \geq 3$  brains, 2 sections per brain in all conditions). **D**) S1 area (One-way ANOVA:  $P$ -value = 0.6769 (n.s.)). **E**) S2 area (One-way ANOVA:  $P$ -value = 0.4172 (n.s.)).

## Figure 2 - figure supplement 1

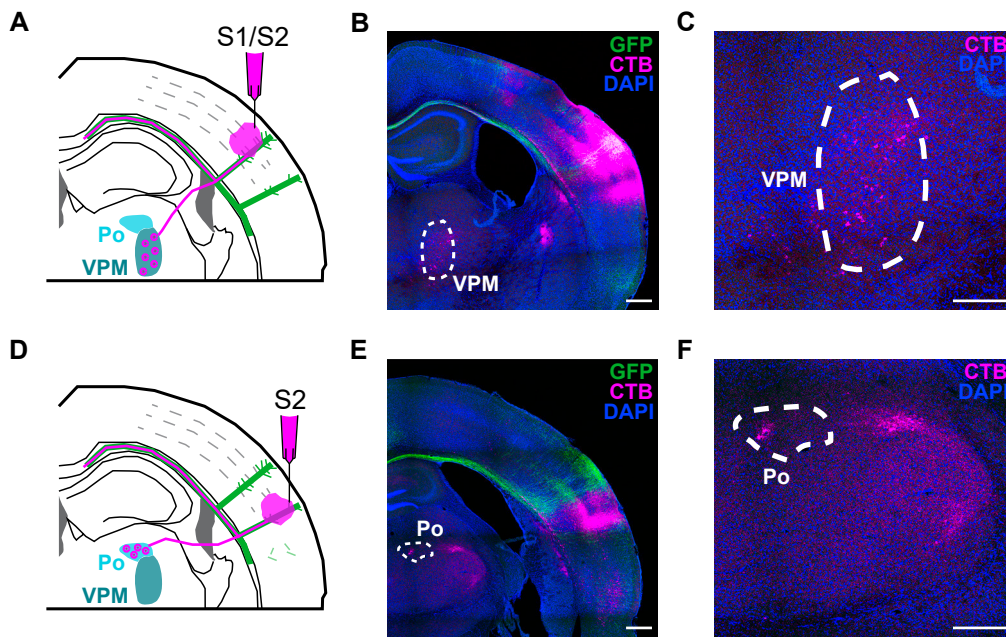

**Figure 2 – figure supplement 1. Retrospective control of correct columnar stereotaxic injections.** **A)** Scheme of coronal section of P30 injected brain in S1/S2 column. Thalamus nucleus VPM (ventral posterior medial nuclei) extend thalamocortical axons to S1/S2 column. **B)** Merge image of coronal section of the contralateral injected side of S1/S2 injection. Dashed line marks VPM, where thalamic neurons are CTB<sup>+</sup>. Green = GFP, Magenta = CTB, Blue = DAPI. Scale bar = 500 μm. **C)** Detail of VPM nucleus. Magenta = CTB, Blue = DAPI. Scale bar = 200 μm. **D)** Scheme of coronal section of P30 injected brain in S2 column. Thalamus nucleus Po (posterior nucleus) extend thalamocortical axons to the S2 column. **E)** Merge image of coronal section of contralateral injected side of S2 injection. Dashed line marks Po, where thalamic neurons are CTB<sup>+</sup>. Green = GFP, Magenta = CTB, Blue = DAPI. Scale bar = 500 μm. **F)** Detail of Po nucleus. Magenta = CTB, Blue = DAPI. Scale bar = 200 μm.

## Figure 2 - figure supplement 2

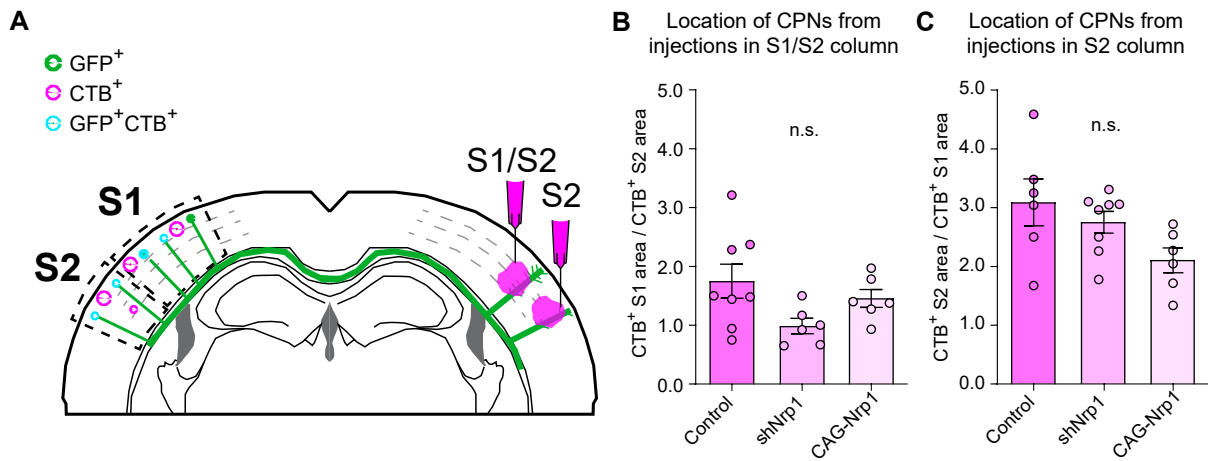

**Figure 2 – figure supplement 2. Analysis of location of CPNs neurons at P30 in somatosensory cortex. A)** Scheme of coronal section of electroporated and injected brain at P30. The injections were made in S1/S2 column in one group and in S2 column in the other group. CTB<sup>+</sup> and GFP<sup>+</sup>CTB<sup>+</sup> populations were quantified individually between the S1 and S2 area and, in the two types of injections. **B-C)** Location of CTB<sup>+</sup> CPNs from injections in S1/S2 column and S2 column. For S1/S2 injections, ratio was calculated between S1CTB<sup>+</sup> and S2CTB<sup>+</sup> neurons. For S2 injections, ratio was calculated between S2CTB<sup>+</sup> and S1CTB<sup>+</sup> neurons. Mean ± SEM ( $n \geq 3$  brains, 2 sections per brain in all conditions. B) S1/S2 injections (One-way ANOVA:  $P$ -value = 0.0840 (n.s.)). C) S2 injections (One-way ANOVA:  $P$ -value = 0.0669 (n.s.)).

### Figure 3 - figure supplement 1

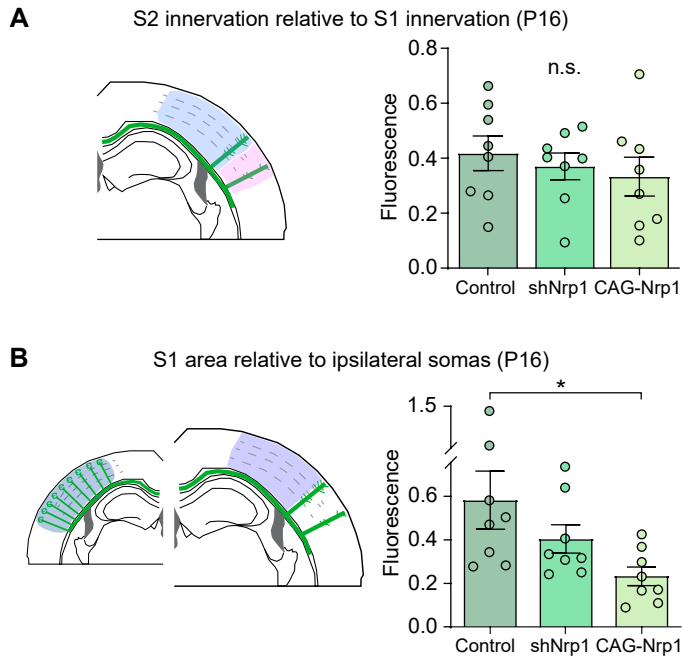

**Figure 3 – figure supplement 1. Analysis of contralateral innervation of SS cortex at P16 upon Nrp1 modifications. A-B)** Quantification of contralateral GFP<sup>+</sup> axons. Mean ± SEM (n ≥ 4 brains, 2 sections per brain in all conditions). A) S2 innervation relative to S1 innervation (One-way ANOVA: *P*-value = 0.6260 (n.s.)). B) S1 area (One-way ANOVA: *P*-value = 0.0385. Posthoc with Tukey's test: \* *p*-value<sub>Control-CAG-Nrp1</sub> = 0.0300).

### Figure 5 - figure supplement 1

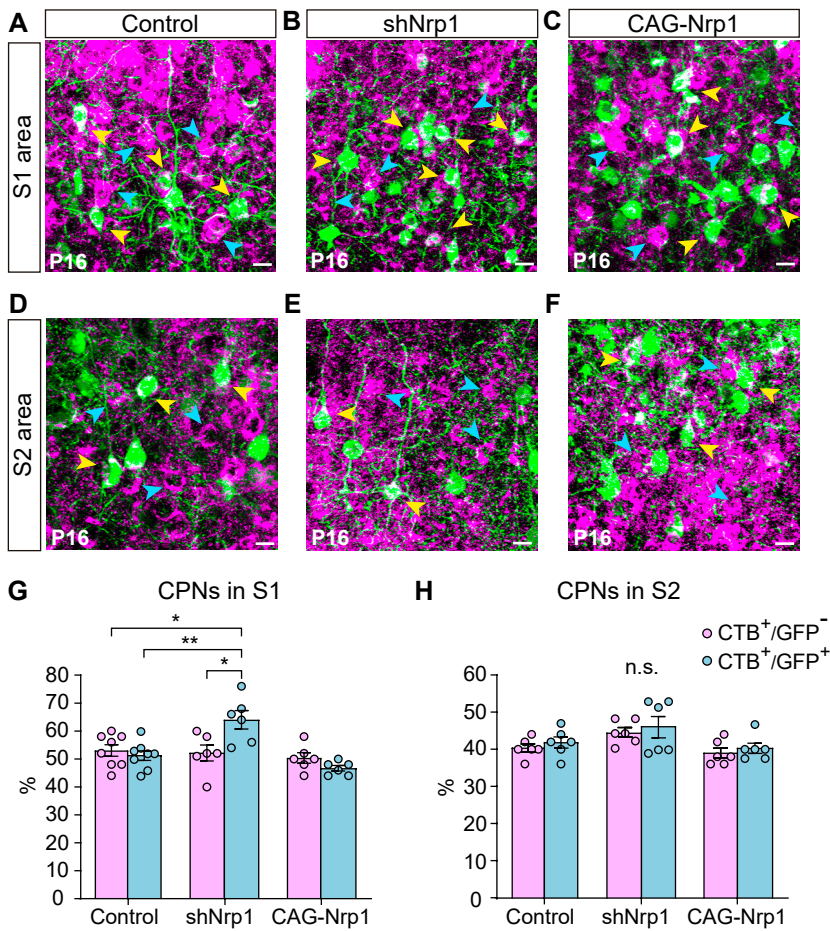

**Figure 5 – figure supplement 1. CPNs proportions of non-electroporated and electroporated neurons at P16. A-F)** Images of L2/3 populations (CTB<sup>+</sup>, blue arrowheads; GFP<sup>+</sup>CTB<sup>+</sup>, yellow arrowheads). Scale bar = 10 μm. A-C) S1L2/3 neurons. D-F) S2L2/3 neurons. **G-H)** Proportion of CTB<sup>+</sup>/GFP<sup>-</sup> neurons, and GFP<sup>+</sup>CTB<sup>+</sup>/GFP<sup>+</sup> in S1 area and S2 area. Mean ± SEM (n ≥ 3 brains, 2 sections per brain in all conditions). **G)** S1 CPNs (Two-way ANOVA: *P*-value Experimental condition = 0.001; *P*-value Population = 0.242. Posthoc with Tukey's test: \* *p*-value shNrp1 GFP<sup>-</sup> - shNrp1 GFP<sup>+</sup> = 0.0127; \*\* *p*-value Control GFP<sup>+</sup> - shNrp1 GFP<sup>+</sup> = 0.0033; \* *p*-value Control GFP<sup>-</sup> - shNrp1 GFP<sup>+</sup> = 0.0135). **H)** S2 CPNs (Two-way ANOVA: *P*-value Experimental condition = 0.072 (n.s.); *P*-value Population = 0.2842).



**Figure 5 - figure supplement 2**

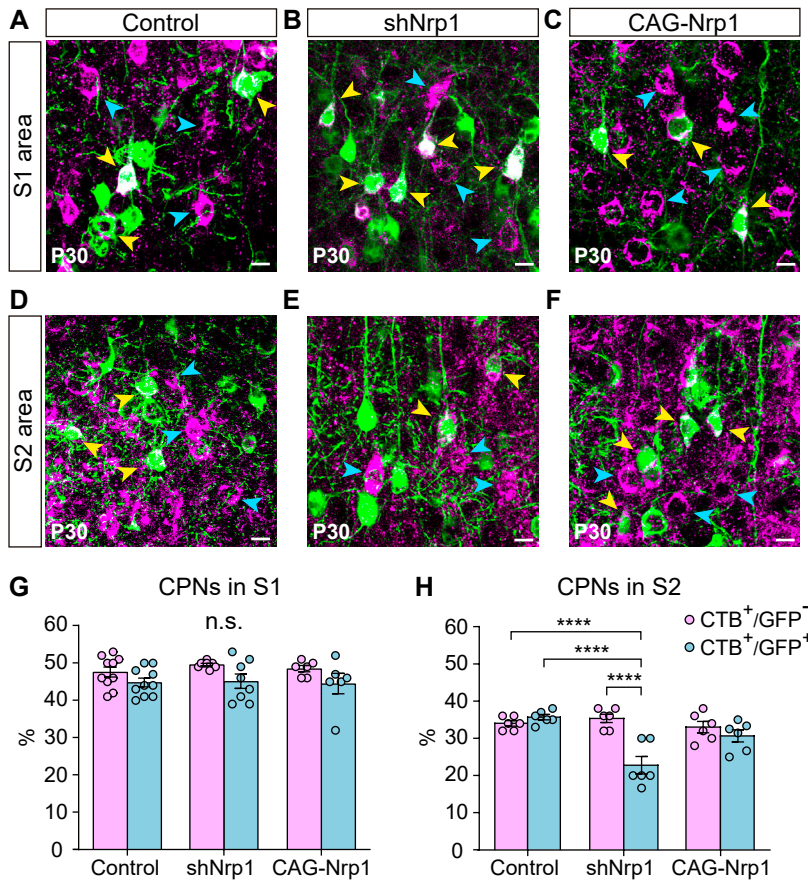

**Figure 5 – figure supplement 2. CPNs proportions of non-electroporated and electroporated neurons at P30. A-F** Images of L2/3 populations (CTB<sup>+</sup>, blue arrowheads; GFP<sup>+</sup>CTB<sup>+</sup>, yellow arrowheads). Scale bar = 10 μm. A-C) S1L2/3 neurons. D-F) S2L2/3 neurons. **G-H**) Proportion of CTB<sup>+</sup>/GFP<sup>-</sup> neurons, and GFP<sup>+</sup>CTB<sup>+</sup>/GFP<sup>+</sup> in S1 area and S2 area. Mean ± SEM (n ≥ 3 brains, 2 sections per brain in all conditions). **G**) S1 CPNs (Two-way ANOVA:  $P$ -value<sub>Experimental condition</sub> = 0.6998 (n.s.);  $P$ -value<sub>Population</sub> = 0.0041). **H**) S2 CPNs (Two-way ANOVA:  $P$ -value<sub>Experimental condition</sub> = 0.0018;  $P$ -value<sub>Population</sub> = 0.0008. Posthoc with Tukey's test: \*\*\*\*  $p$ -value<sub>shNrp1 CTB<sup>+</sup>/GFP<sup>-</sup> - shNrp1 CTB<sup>+</sup>/GFP<sup>+</sup></sub> < 0.0001; \*\*\*\*  $p$ -value<sub>Control CTB<sup>+</sup>/GFP<sup>-</sup> - shNrp1 CTB<sup>+</sup>/GFP<sup>+</sup></sub> < 0.0001; \*\*\*\*  $p$ -value<sub>Control CTB<sup>+</sup>/GFP<sup>-</sup> - shNrp1 CTB<sup>+</sup>/GFP<sup>-</sup></sub> < 0.0001).
